# Supplementary material for: Allantoin, a stress-related purine metabolite, can activate jasmonate signaling in a MYC2-regulated and abscisic acid-dependent manner
Source: PubMed Central journal article supplement (PMC4809300; doi:10.1093/jxb/erw071), 2016-03-01
Supplement: supp_erw071_supplementary_methods_figures_S1_S7_tables_S1_S4.pdf [file supp_erw071_supplementary_methods_figures_S1_S7_tables_S1_S4.pdf]

## Supplementary Data

### **Allantoin, a stress-related purine metabolite, can activate jasmonate signaling in a MYC2-regulated and abscisic acid-dependent manner**

Hiroshi Takagi, Yasuhiro Ishiga, Shunsuke Watanabe, Tomokazu Konishi, Mayumi Egusa, Nobuhiro Akiyoshi, Takakazu Matsuura, Izumi C. Mori, Takashi Hirayama, Hironori Kaminaka, Hiroshi Shimada, and Atsushi Sakamoto

The following Supplementary Data are available for this article:

**Methods S1.** Quantification of JA and JA-Ile; Accession numbers.

**Figure S1.** The purine catabolism pathway and metabolites derived therefrom.

**Figure S2.** Hierarchical tree graph of over-represented GO terms for genes with significantly increased expression in the *aln-1* mutant.

**Figure S3.** Hierarchical tree graph of over-represented GO terms for genes with significantly reduced expression in the *aln-1* mutant.

**Figure S4.** Basal level expression of *PR-1* as a canonical SA marker.

**Figure S5.** Characterization of the *aln-1 jar1-1* double mutant.

**Figure S6.** Reduced response to MeJA of anthocyanin accumulation in the *aah* mutant.

**Figure S7.** Characterization of the *aln-1 bglu18* double mutant.

**Table S1.** Primers used in this study.

**Table S2.** LC-ESI-MS/MS parameters for jasmonate determination.

**Table S3.** Genes with significantly increased expression in the *aln-1* mutant.

**Table S4.** Genes with significantly reduced expression in the *aln-1* mutant.

## Supplementary Methods S1

### *Quantification of jasmonic acid (JA) and JA-Ile*

Extraction and quantification of JA and JA-Ile were performed following the method of Preston *et al.* (2009) with minor modifications. The stable isotope-labeled compounds used as internal standards were: [<sup>2</sup>H<sub>2</sub>]JA (Tokyo Chemical industry Co., Ltd., Tokyo, Japan) and [<sup>13</sup>C<sub>6</sub>]JA-Ile, which was synthesized with [<sup>13</sup>C<sub>6</sub>]Ile (Cambridge Isotope Laboratories, Andover, MA, USA) as described in Jikumaru *et al.* (2004). Aerial parts (500 mg) from 2-week-old seedlings grown aseptically on solid half-strength MS medium were frozen in liquid N<sub>2</sub>, ground, and extracted with 80% (v/v) methanol containing 1% (v/v) acetic acid at 4°C for 1 h. After removal of cell debris by centrifugation, the supernatants were condensed and dried *in vacuo*, and the resultant residues were extracted twice with methanol. The extracts were evaporated to dryness and resuspended with 80% methanol containing 1% acetic acid and internal standards, which were again evaporated and then extracted with water acidified with 1% (v/v) acetic acid. The extracts were loaded onto pre-equilibrated Oasis HLB column cartridge (Waters Corporation, Milford, MA, USA). After washed with water acidified with 1% acetic acid, the column was eluted with 80% (v/v) acetonitrile containing 1% (v/v) acetic acid. The eluted samples were evaporated to obtain extracts in water acidified with 1% acetic acid, and loaded onto a pre-equilibrated Oasis MCX column cartridge (Waters). The cartridge was washed with water acidified with 1% acetic acid and eluted with 80% acetonitrile containing 1% acetic acid. The eluate was loaded onto pre-equilibrated Oasis WAX column cartridges (Waters) followed by washing, first with water acidified 1% acetic acid and then with 80% acetonitrile, and the fraction containing JA and JA-Ile was eluted with 80% acetonitrile containing 1% acetic acid. The obtained fraction was dried and reconstituted in ultra-pure water acidified with 1% (v/v) acetic acid for quantification of JA and JA-Ile by liquid chromatography-electrospray ionization-tandem mass spectrometry (LC-ESI-MS/MS) on an Agilent 6410 Triple Quadrupole system with a ZORBAX Eclipse XDB-C18 column and MassHunter software version B.01.02 (Agilent Technology, Palo Alto, CA, USA). The LC column was eluted with a binary solvent system of 0.01% (v/v) acetic acid in water (solvent A) and 0.05% (v/v) acetic acid in acetonitrile (solvent B) using a linear gradient of solvent B in solvent A, from 3% to 50%, in 20 min at the flow rate of 0.4 ml min<sup>-1</sup>. The MS/MS operation parameters are summarized in Supplementary Table S2.

### *Accession numbers*

Arabidopsis Genome Initiative numbers for the genes mentioned in this article are as follows:

*AAH*, At4g20070; *ABA2*, At1g52340; *ACT2*, At3g18780; *ALN*, At4g04955; *ANAC019*, At1g52890; *ANAC055*, At3g15500; *ANAC072*, At4g27410; *AOC1*, At3g25760; *AOS*, At5g42650; *BGLUI8*, At1g52400; *BSMT1*, At3g11480; *CYP94B3*, At3g48520; *ERF1*, At3g23240; *ICSI1*, At1g74710; *JAMI*, At2g46510; *JARI*, At2g46370; *JAZ1*, At1g19180; *JAZ3*, At3g17860; *JAZ5*, At1g17380; *JAZ6*, At1g72450; *JAZ7*, At2g34600; *JAZ10*, At5g13220; *JAZ12*, At5g20900; *LOX2*, At3g45140; *LOX3*, At1g17420; *LOX4*, At1g72520; *MYC2*, At1g32640; *OPR3*, At2g06050; *ORA59*, At1g06160; *PDF1.2a*, At5g44420; *PDF1.2b*, At2g26020; *PR-1*, At2g14610; *SAGT1*, At2g43820; *VSPI*, At5g24780; and *XDHL*, At4g34890.

## Supplementary Figure Legends

### **Figure S1. The purine catabolism pathway and metabolites derived therefrom.**

The pathway is schematically illustrated starting from the common intermediate xanthine, at which all purine nucleotides converge when they are subjected to degradation. The abbreviated names of the genes encoding the enzymes that catalyze each step are shown in italics and knockout mutants used in this study are indicated in parentheses under the gene names: XDH, xanthine dehydrogenase; UOX, urate oxidase; AS, allantoin synthase; ALN, allantoinase (allantoin amidohydrolase); AAH, allantoate amidohydrolase; UGAH, ureidoglycine aminohydrolase; UAH, ureidoglycolate amidohydrolase.

### **Figure S2. Hierarchical tree graph of over-represented GO terms for genes with significantly increased expression in the *aln-1* mutant.**

A total of 47 enriched GO terms under Biological Process were found for 211 genes with significantly increased expression ( $\geq 3$ -fold changes, Supplementary Table S3) using the BioMaps tool of VirtualPlant version 1.3 (Katari *et al.*, 2010; <http://virtualplant.bio.nyu.edu/cgi-bin/vpweb/>) in the default-setting mode (Fisher's exact test with false discovery rate correction,  $P < 0.01$ ). Each box shows the name of the GO term and, where appropriate, the  $P$  value ( $< 0.01$ ) for the significance of enrichment. The  $P$  values are also indicated by the frame color of each box according to the gradient scale. The rank direction of the graph runs from top to bottom.

### **Figure S3. Hierarchical tree graph of over-represented GO terms for genes with significantly reduced expression in the *aln-1* mutant.**

A total of 33 enriched GO terms under Biological Process were found for 113 genes with significantly reduced expression ( $\geq 3$ -fold changes, Supplementary Table S4) using the BioMaps tool of VirtualPlant version 1.3 (Katari *et al.*, 2010; <http://virtualplant.bio.nyu.edu/cgi-bin/vpweb/>) in the default-setting mode (Fisher's exact test with false discovery rate correction,  $P < 0.01$ ). Each box shows the name of the GO term and, where appropriate, the  $P$  value ( $< 0.01$ ) for the significance of enrichment. The  $P$  values are also indicated by the frame color of each box according to the gradient scale. The rank direction of the graph runs from top to bottom.

### **Figure S4. Basal level expression of *PR-1* as a canonical SA marker.**

RNA was extracted from aerial parts of 2-week-old seedlings of WT and *aln-1* mutants grown under normal aseptic conditions. Relative mRNA levels were determined by real-time reverse

transcription-quantitative PCR using *ACTIN2* expression as reference and presented as values relative to the WT level. The sequences of primers are listed in Supplementary Table S1. Data are means  $\pm$  SEM from three independent experiments ( $*P < 0.05$  by Student's *t*-test comparison to the WT level).

**Figure S5. Characterization of the *aln-1 jar1-1* double mutant.**

The homozygous mutants of *aln-1* (SALK\_000325; Yang and Han, 2004; Watanabe *et al.*, 2014) and *jar1-1* (CS8072; Staswick *et al.*, 1992) were crossed to obtain the double mutant *aln-1 jar1-1*. (A) Diagram of the T-DNA insertion in the *ALN* gene in the *aln-1* mutant. Arrows denote PCR primers. (B) PCR-based genotyping of the double mutant using primers specific to *ALN* (F1 and R1) and the left border sequence of T-DNA (Lba1). (C) Diagram of the *JAR1* gene structure and the confirmation of the *jar1-1* mutation in the double mutant. The nucleotide sequence of the wild-type *JAR1* allele (*a*) from TAIR (At2g46370; <https://www.arabidopsis.org/>) was compared to that of the double mutant, as determined by dideoxy sequencing with primers F2 (*b*) and R2 (*c*), to confirm the single nucleotide missense mutation that occurs in exon 3 (Staswick *et al.*, 2002). The sequences of primers are listed in Supplementary Table S1. (D) Typical root growth of 8-day-old seedlings of WT, *jar1-1*, and *aln-1 jar1-1* genotypes in the presence of 10  $\mu$ M methyl jasmonate (MeJA). Note that the root growth of the *jar1-1* mutant is moderately insensitive to MeJA (Staswick *et al.*, 1992, 2002). Horizontal bars indicate a scale of 10 mm in length (white) and the position of a primary root tip (yellow).

**Figure S6. Reduced response to MeJA of anthocyanin accumulation in the *aah* mutant.**

Sterile seedlings of WT and the *aah* mutant were grown for 8 days on standard medium supplemented with 10  $\mu$ M MeJA and examined for anthocyanin accumulation as described in the main text. FW, fresh weight. Data are means  $\pm$  SEM ( $n = 8$ ;  $*P < 0.001$  by Student's *t*-test comparison to the WT levels).

**Figure S7. Characterization of the *aln-1 bglu18* double mutant.**

The homozygous mutants of *aln-1* (SALK\_000325; Yang and Han, 2004; Watanabe *et al.*, 2014) and *bglu18* (SALK\_075731C; Ogasawara *et al.*, 2009) were crossed to obtain the double mutant *aln-1 bglu18*. (A) Diagram of the T-DNA insertion in the *BGLUI8* gene in the *bglu18* mutant. Arrows denote PCR primers. (B) PCR-based genotyping of the double mutant using primers specific to *ALN* (F1 and R4; see Supplementary Fig. S5), *BGLUI8* (F3 and R3), and the left border sequence of T-DNA (Lba1). The sequences of primers are listed in Supplementary Table S1.

## Supplementary Table Legends

### Table S1. Primers used in this study.

<sup>a</sup> *Arabidopsis thaliana* gene identifier code assigned by the Arabidopsis Genome Initiatives (AGI; <https://www.arabidopsis.org/portals/nomenclature/>).

<sup>b</sup> Gene symbol as provided by The Arabidopsis Information Resource (TAIR; release 10; <https://www.arabidopsis.org/>) except for T-DNA of *Agrobacterium tumefaciens*.

### Table S2. LC-ESI-MS/MS parameters for jasmonate determination.

### Table S3. Genes with significantly increased expression in the *aln-1* mutant.

Listed are those whose changes in transcript levels increased by equal to or greater than 3-fold, with the statistical significance level of 0.001 by a two-way analysis of variance (ANOVA). These genes were selected from the revised microarray data (Gene Expression Omnibus accession number GSE73841) that had been parametrically renormalized using the SuperNORM data service (Skylight Biotech Inc, Akita, Japan), according to the three-parameter lognormal distribution method (Konishi, 2004).

<sup>a</sup> *Arabidopsis thaliana* gene identifier code assigned by the Arabidopsis Genome Initiatives (AGI; <https://www.arabidopsis.org/portals/nomenclature/>).

<sup>b</sup> Mean of two independent biological experiments (*aln-1* versus wild-type).

<sup>c</sup> Gene symbol and description as provided by The Arabidopsis Information Resource (TAIR; release 10; <https://www.arabidopsis.org/>).

<sup>d</sup> *P*-value determined by a two-way ANOVA.

### Table S4. Genes with significantly reduced expression in the *aln-1* mutant.

Listed are those whose changes in transcript levels decreased by equal to or greater than 3-fold with the statistical significance level of 0.001 by a two-way ANOVA. These genes were selected from the revised microarray data (Gene Expression Omnibus accession number GSE73841) that had been parametrically renormalized using the SuperNORM data service (Skylight Biotech Inc, Akita, Japan), according to the three-parameter lognormal distribution method (Konishi, 2004).

<sup>a</sup> *Arabidopsis thaliana* gene identifier code assigned by the Arabidopsis Genome Initiatives (AGI; <https://www.arabidopsis.org/portals/nomenclature/>).

<sup>b</sup> Mean of two independent biological experiments (*aln-1* versus wild-type).

<sup>c</sup> Gene symbol and description as provided by The Arabidopsis Information Resource (TAIR; release 10; <https://www.arabidopsis.org/>).

<sup>d</sup> *P*-value determined by a two-way ANOVA.

## Supplementary References

- Jikumaru Y, Asami T, Seto H, et al.** 2004. Preparation and biological activity of molecular probes to identify and analyze jasmonic acid-binding proteins. *Bioscience, Biotechnology, and Biochemistry* **68**, 1461–1466.
- Katari MS, Nowicki SD, Aceituno FF, et al.** 2010. VirtualPlant: a software platform to support systems biology research. *Plant Physiology* **152**, 500–515.
- Konishi T.** 2004. Three-parameter lognormal distribution ubiquitously found in cDNA microarray data and its application to parametric data treatment. *BMC Bioinformatics* **5**, 5.
- Ogasawara K, Yamada K, Christeller JT, Kondo M, Hatsugai N, Hara-Nishimura I, Nishimura M.** 2009. Constitutive and inducible ER bodies of *Arabidopsis thaliana* accumulate distinct  $\beta$ -glucosidases. *Plant and Cell Physiology* **50**, 480–488.
- Preston J, Tatematsu K, Kanno Y, Hobo T, Kimura M, Jikumaru Y, Yano R, Kamiya Y, Nambara E.** 2009. Temporal expression patterns of hormone metabolism genes during imbibition of *Arabidopsis thaliana* seeds: A comparative study on dormant and non-dormant accessions. *Plant and Cell Physiology* **50**, 1786–1800.
- Staswick PE, Su W, Howell SH.** 1992. Methyl jasmonate inhibition of root growth and induction of a leaf protein are decreased in an *Arabidopsis thaliana* mutant. *Proceedings of the National Academy of Sciences of the United States of America* **89**, 6837–6840.
- Staswick PE, Tiryaki I, Rowe ML.** 2002. Jasmonate response locus *JAR1* and several related *Arabidopsis* genes encode enzymes of the firefly luciferase superfamily that show activity on jasmonic, salicylic, and indole-3-acetic acids in an assay for adenylation. *The Plant Cell* **14**, 1405–1415.
- Watanabe S, Matsumoto M, Hakomori Y, Takagi H, Shimada H, Sakamoto A.** 2014. The purine metabolite allantoin enhances abiotic stress tolerance through synergistic activation of abscisic acid metabolism. *Plant, Cell & Environment* **37**, 1022–1036.
- Yang J, Han K-H.** 2004. Functional characterization of allantoinase genes from *Arabidopsis* and a nonureide-type legume black locust. *Plant Physiology* **134**, 1039–1049.

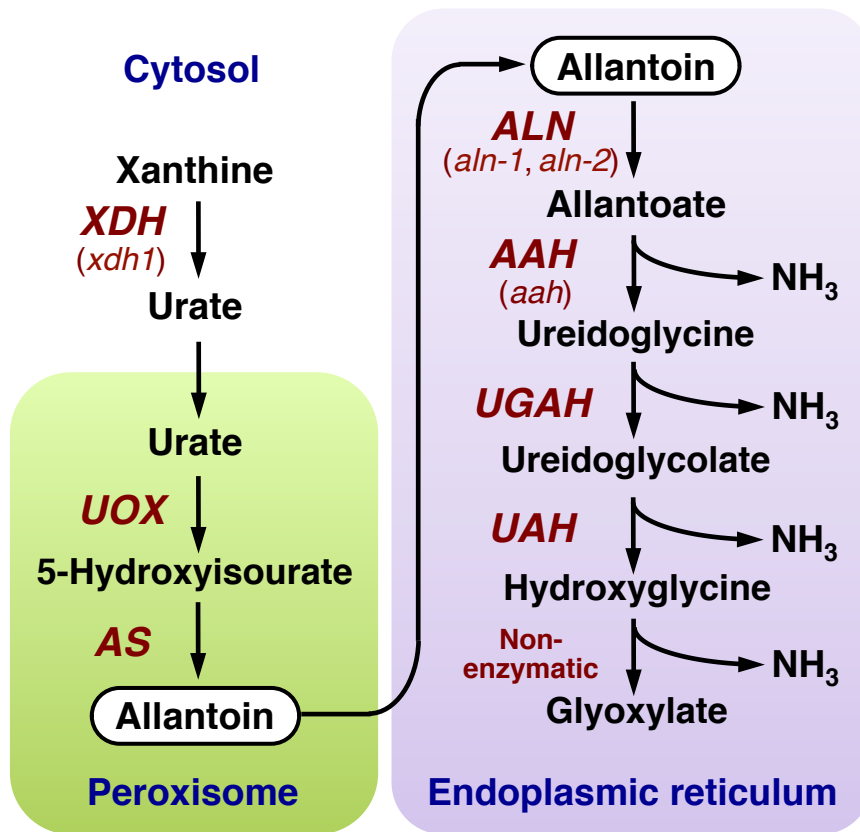

**Figure S1. The purine catabolism pathway and metabolites derived therefrom.**

The pathway is schematically illustrated starting from the common intermediate xanthine, at which all purine nucleotides converge when they are subjected to degradation. The abbreviated names of the genes encoding the enzymes that catalyze each step are shown in italics and knockout mutants used in this study are indicated in parentheses under the gene names: *XDH*, xanthine dehydrogenase; *UOX*, urate oxidase; *AS*, allantoin synthase; *ALN*, allantoinase (allantoin amidohydrolase); *AAH*, allantoate amidohydrolase; *UGAH*, ureidoglycine aminohydrolase; *UAH*, ureidoglycolate amidohydrolase.



## Supplementary Figures

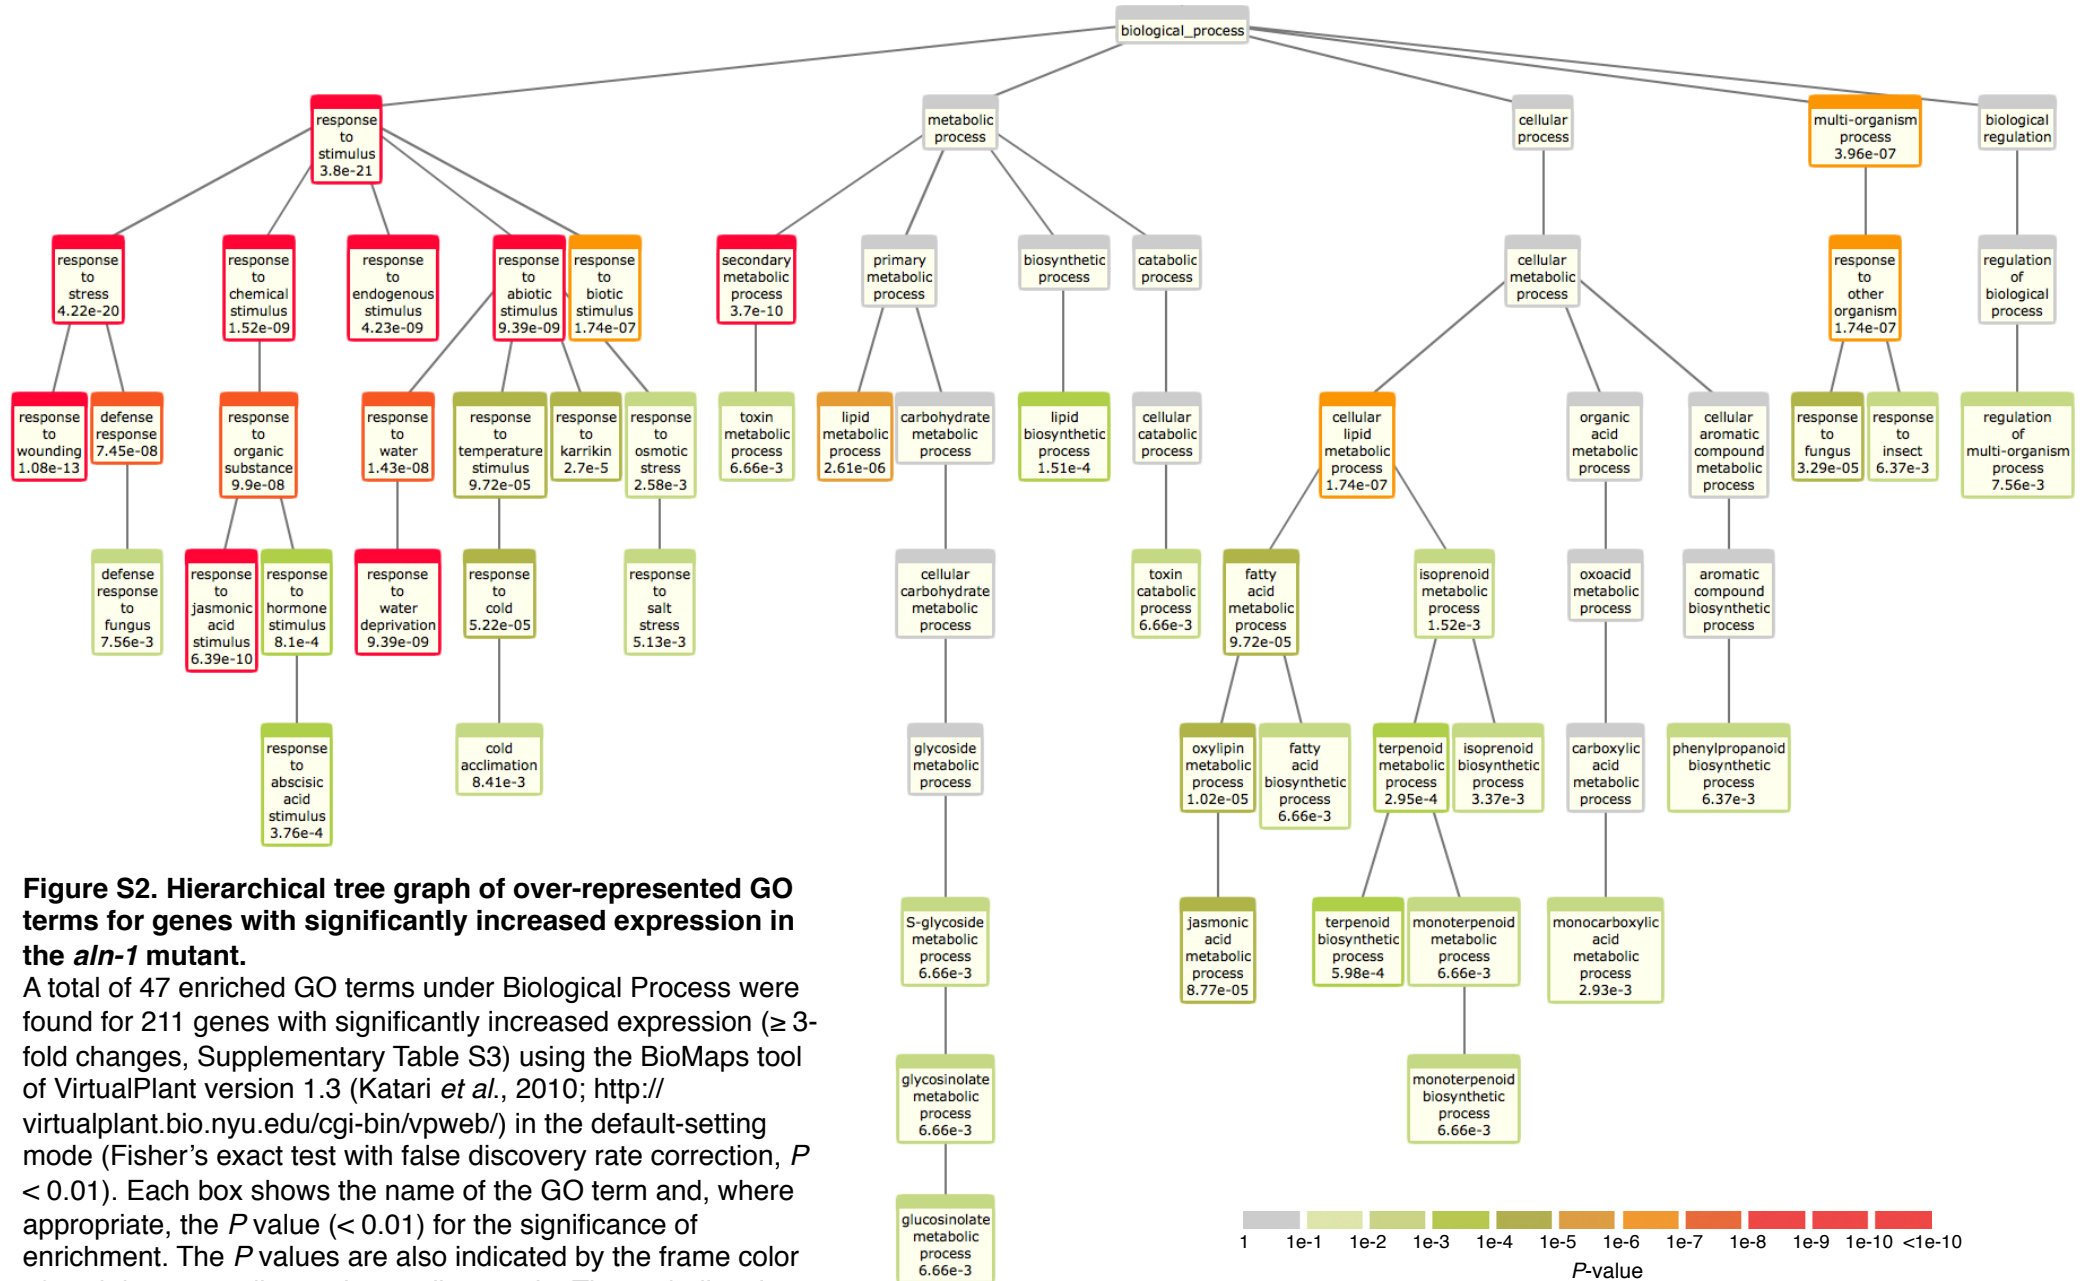

**Figure S2. Hierarchical tree graph of over-represented GO terms for genes with significantly increased expression in the *ain-1* mutant.**

A total of 47 enriched GO terms under Biological Process were found for 211 genes with significantly increased expression ( $\geq 3$ -fold changes, Supplementary Table S3) using the BioMaps tool of VirtualPlant version 1.3 (Katari *et al.*, 2010; <http://virtualplant.bio.nyu.edu/cgi-bin/vpweb/>) in the default-setting mode (Fisher's exact test with false discovery rate correction,  $P < 0.01$ ). Each box shows the name of the GO term and, where appropriate, the  $P$  value ( $< 0.01$ ) for the significance of enrichment. The  $P$  values are also indicated by the frame color of each box according to the gradient scale. The rank direction of the graph runs from top to bottom.

## Supplementary Figures

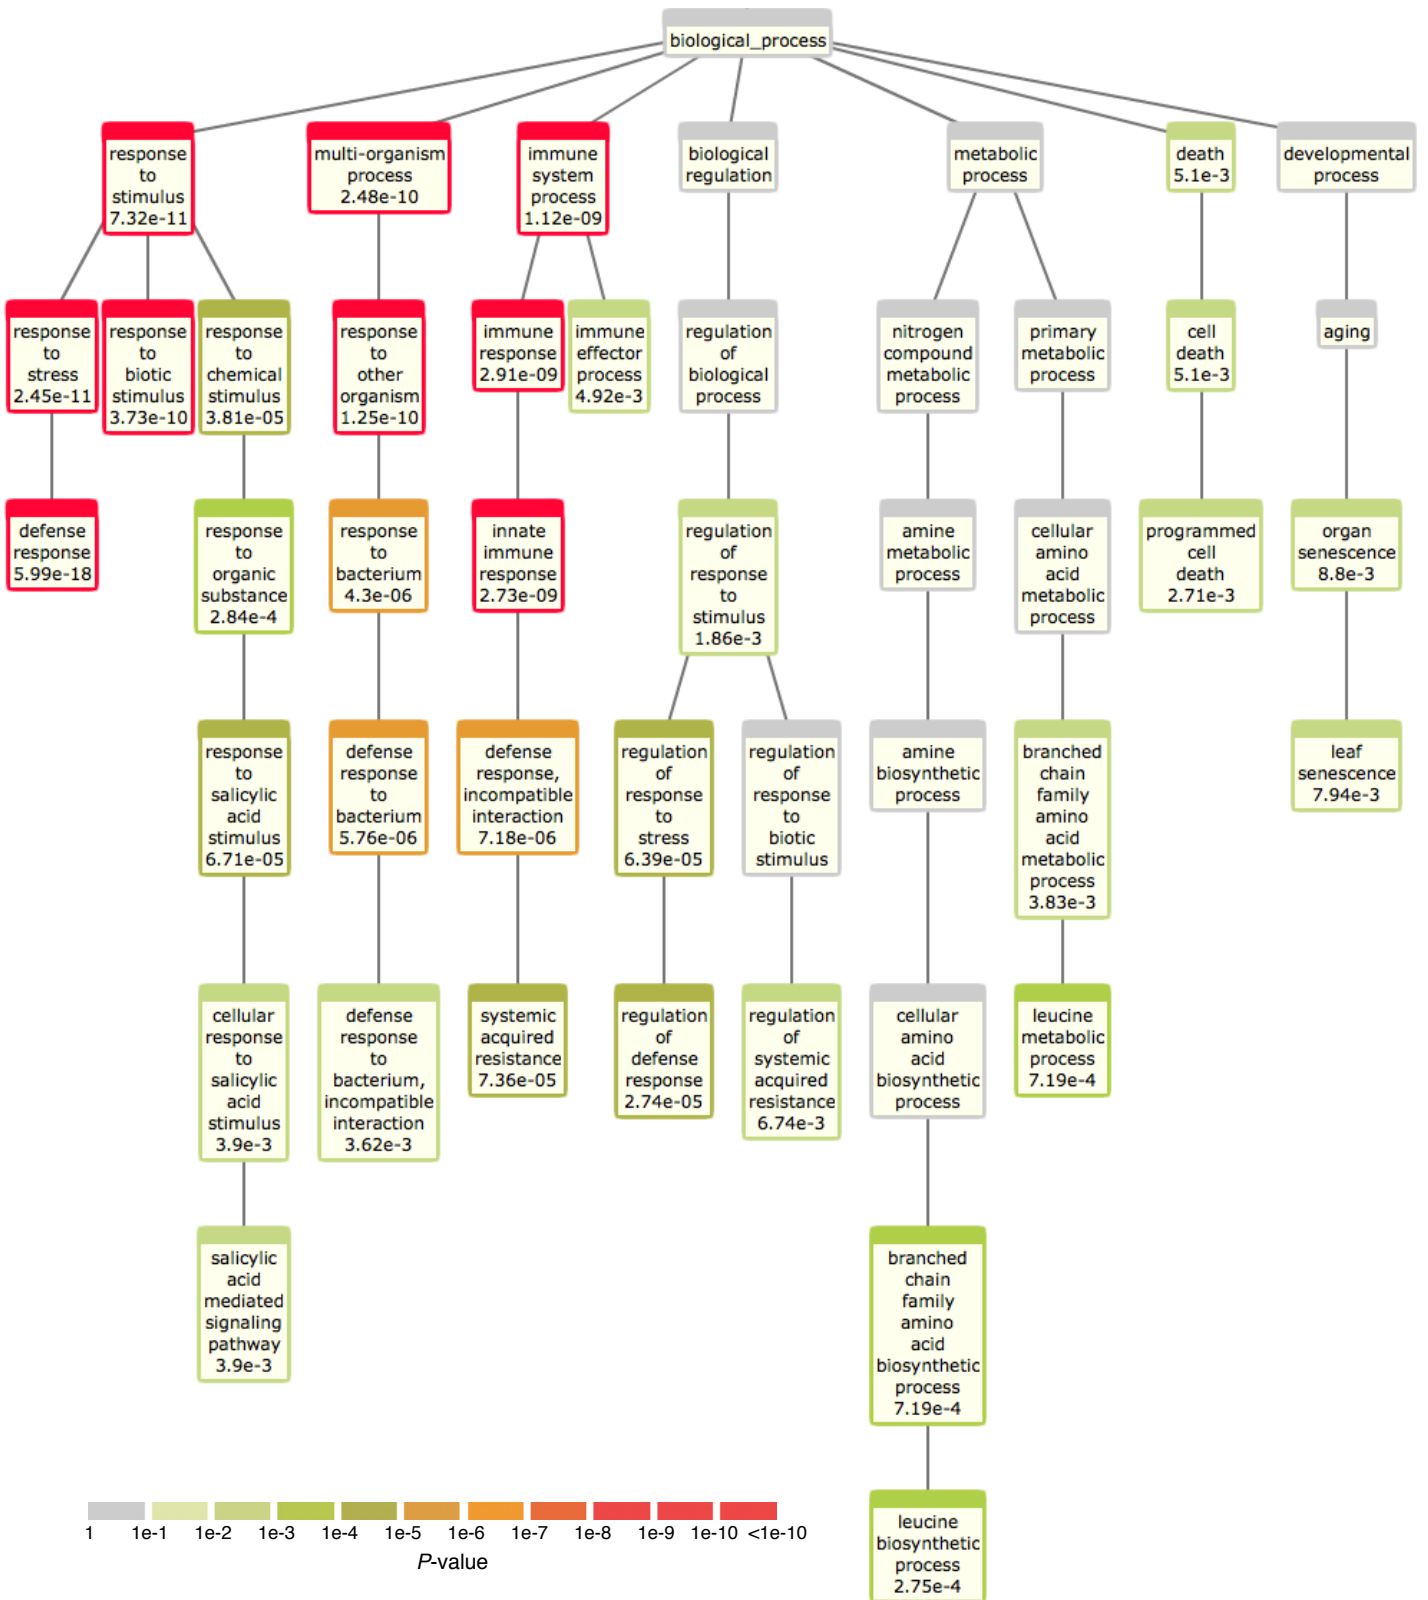

**Figure S3. Hierarchical tree graph of over-represented GO terms for genes with significantly reduced expression in the *aln-1* mutant.**

A total of 33 enriched GO terms under Biological Process were found for 113 genes with significantly reduced expression ( $\geq 3$ -fold changes, Supplementary Table S4) using the BioMaps tool of VirtualPlant version 1.3 (Katari *et al.*, 2010; <http://virtualplant.bio.nyu.edu/cgi-bin/vpweb/>) in the default-setting mode (Fisher's exact test with false discovery rate correction,  $P < 0.01$ ). Each box shows the name of the GO term and, where appropriate, the  $P$  value ( $< 0.01$ ) for the significance of enrichment. The  $P$  values are also indicated by the frame color of each box according to the gradient scale. The rank direction of the graph runs from top to bottom.

## Supplementary Figures

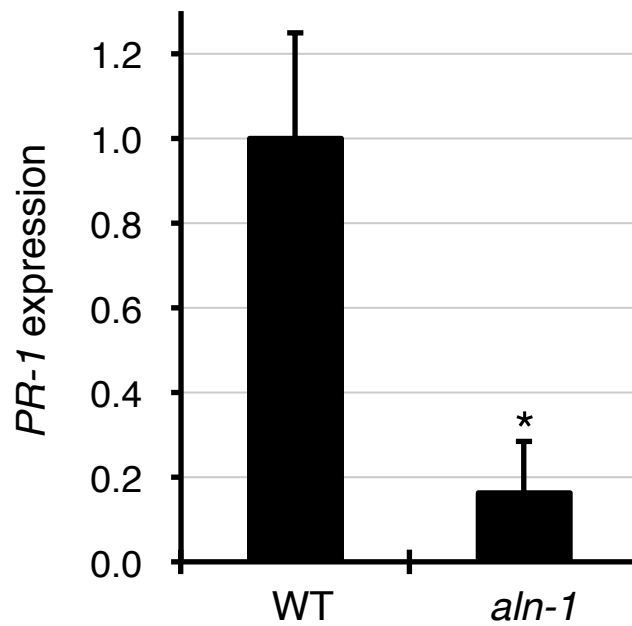

**Figure S4. Basal level expression of *PR-1* as a canonical SA marker.**

RNA was extracted from aerial parts of 2-week-old seedlings of WT and *aln-1* mutants grown under normal aseptic conditions. Relative mRNA levels were determined by real-time reverse transcription-quantitative PCR using *ACTIN2* expression as reference and presented as values relative to the WT level. The sequences of primers are listed in Supplementary Table S1. Data are means ± SEM from three independent experiments (\* $P < 0.05$  by Student's *t*-test comparison to the WT level).

Supplementary Figures

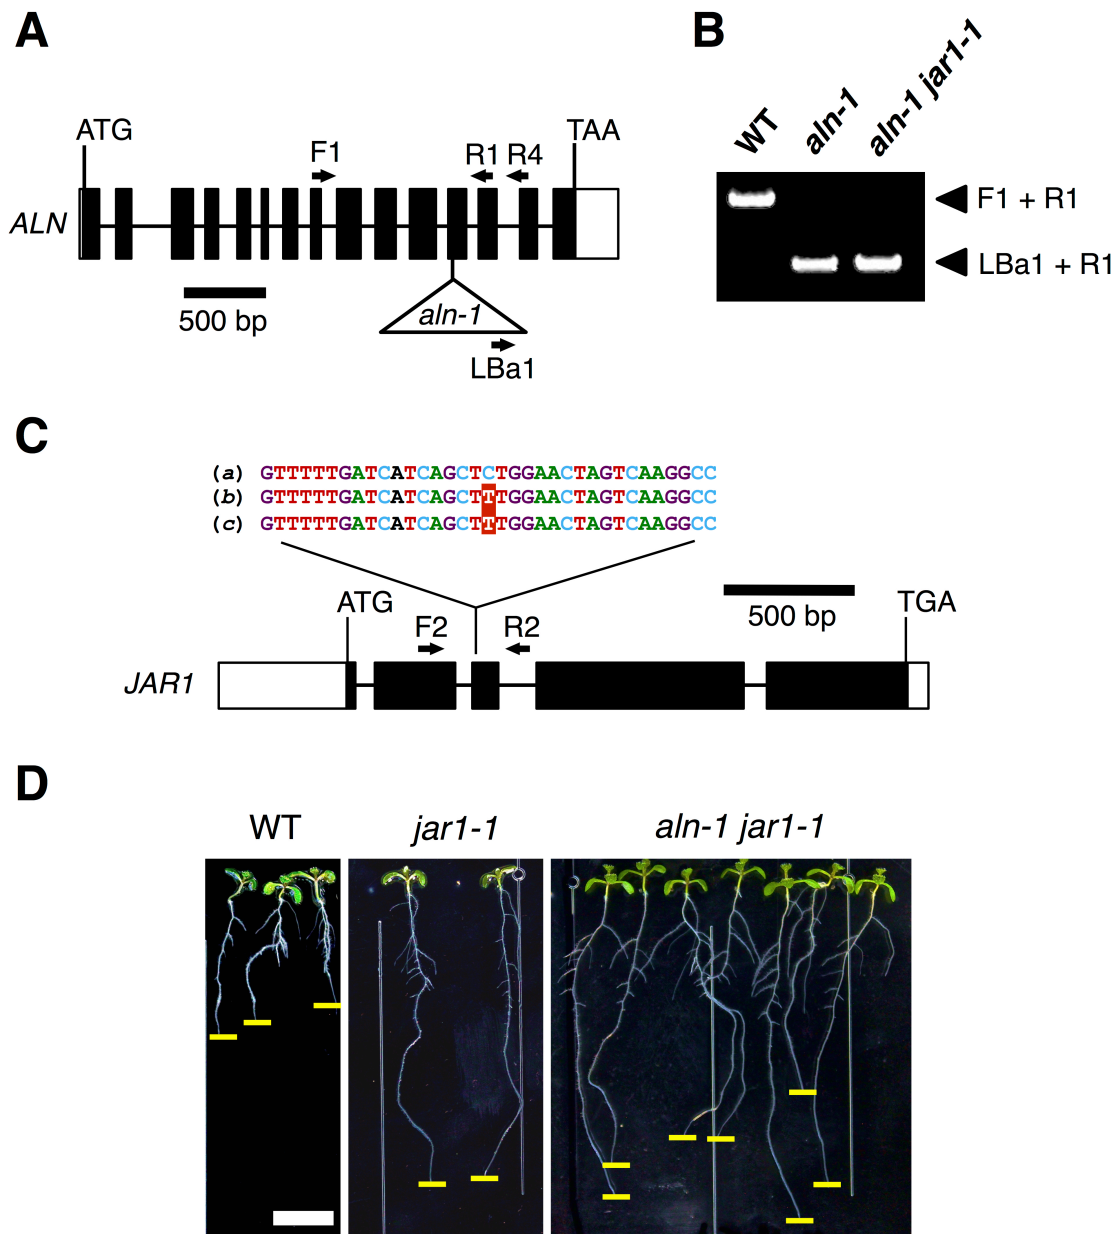

**Figure S5. Characterization of the *aln-1 jar1-1* double mutant.**

The homozygous mutants of *aln-1* (SALK\_000325; Yang and Han, 2004; Watanabe *et al.*, 2014) and *jar1-1* (CS8072; Staswick *et al.*, 1992) were crossed to obtain the double mutant *aln-1 jar1-1*. (A) Diagram of the T-DNA insertion in the *ALN* gene in the *aln-1* mutant. Arrows denote PCR primers. (B) PCR-based genotyping of the double mutant using primers specific to *ALN* (F1 and R1) and the left border sequence of T-DNA (LBa1). (C) Diagram of the *JAR1* gene structure and the confirmation of the *jar1-1* mutation in the double mutant. The nucleotide sequence of the wild-type *JAR1* allele (a) from TAIR (At2g46370; <https://www.arabidopsis.org/>) was compared to that of the double mutant, as determined by dideoxy sequencing with primers F2 (b) and R2 (c), to confirm the single nucleotide missense mutation that occurs in exon 3 (Staswick *et al.*, 2002). The sequences of primers are listed in Supplementary Table S1. (D) Typical root growth of 8-day-old seedlings of WT, *jar1-1*, and *aln-1 jar1-1* genotypes in the presence of 10  $\mu$ M methyl jasmonate (MeJA). Note that the root growth of the *jar1-1* mutant is moderately insensitive to MeJA (Staswick *et al.*, 1992, 2002). Horizontal bars indicate a scale of 10 mm in length (white) and the position of a primary root tip (yellow).

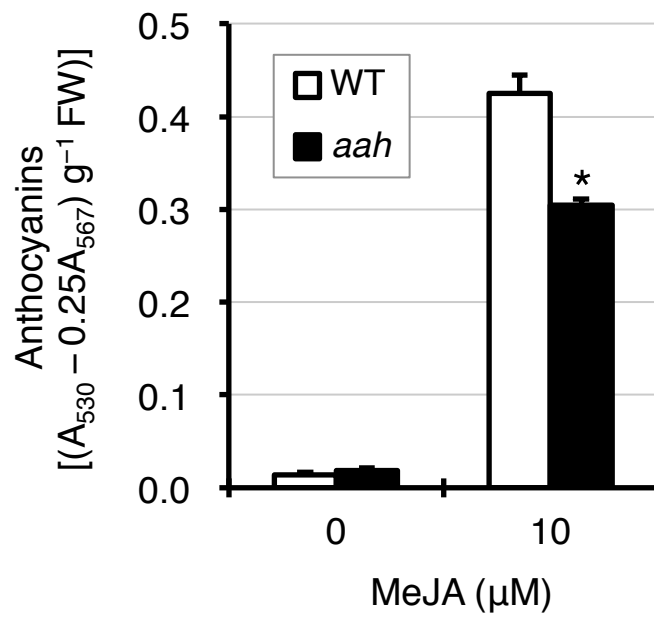

**Figure S6. Reduced response to MeJA of anthocyanin accumulation in the *aah* mutant.**

Sterile seedlings of WT and the *aah* mutant were grown for 8 days on standard medium supplemented with 10 μM MeJA and examined for anthocyanin accumulation as described in the main text. FW, fresh weight. Data are means ± SEM ( $n = 8$ ; \* $P < 0.001$  by Student's *t*-test comparison to the WT levels).

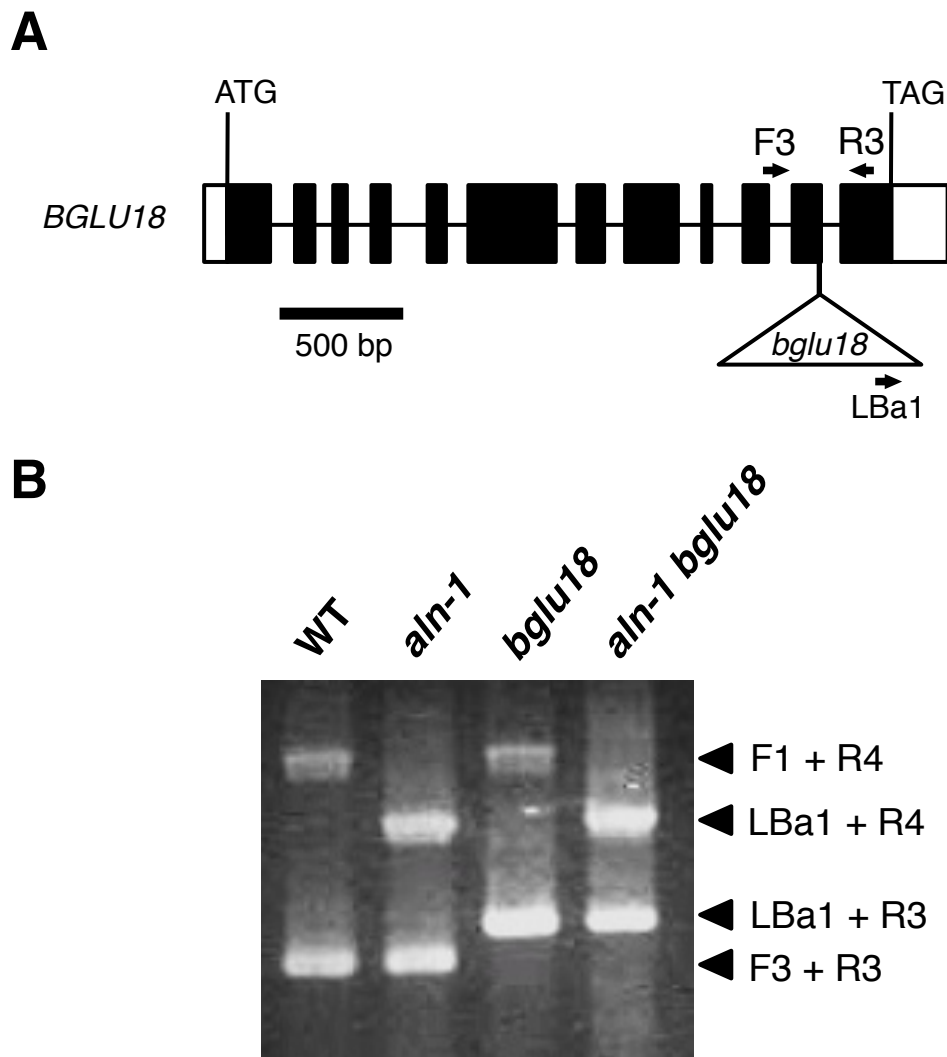

**Figure S7. Characterization of the *aln-1 bglu18* double mutant.**

The homozygous mutants of *aln-1* (SALK\_000325; Yang and Han, 2004; Watanabe *et al.*, 2014) and *bglu18* (SALK\_075731C; Ogasawara *et al.*, 2009) were crossed to obtain the double mutant *aln-1 bglu18*. (A) Diagram of the T-DNA insertion in the *BGLU18* gene in the *bglu18* mutant. Arrows denote PCR primers. (B) PCR-based genotyping of the double mutant using primers specific to *ALN* (F1 and R4; see Supplementary Fig. S5), *BGLU18* (F3 and R3), and the left border sequence of T-DNA (LBa1). The sequences of primers are listed in Supplementary Table S1.

**Table S1. Primers used in this study**

| AGI <sup>a</sup> | Gene symbol <sup>b</sup> | Direction | Sequence (Designation)              | Use            |
|------------------|--------------------------|-----------|-------------------------------------|----------------|
| At4g04955        | <i>ALN</i>               | Forward   | 5'-CCTTTATGTGCCCTTCAGGA-3' (F1)     | PCR genotyping |
|                  |                          | Reverse   | 5'-GGCCTATCACTCCACCAAGA-3' (R1)     | PCR genotyping |
|                  |                          | Reverse   | 5'-GGTCCCACACAACAAGATCTGC-3' (R4)   | PCR genotyping |
| At1g52400        | <i>BGLU18</i>            | Forward   | 5'-GGCGACCCAGAAGTTATCAT-3' (F3)     | PCR genotyping |
|                  |                          | Reverse   | 5'-GAATACCATTTGCCCGAAAC-3' (R3)     | PCR genotyping |
| At2g46370        | <i>JAR1</i>              | Forward   | 5'-CGCTACTGACCCTGAAGAAGCTTT-3' (F2) | DNA sequencing |
|                  |                          | Reverse   | 5'-CAACATGTTAAGGCATAGTCG-3' (R2)    | DNA sequencing |
| At1g17420        | <i>LOX3</i>              | Forward   | 5'-TGAACATTGAGAGAGTCAAGACTTTT-3'    | RT-qPCR        |
|                  |                          | Reverse   | 5'-AGATAGTTCGAGTAGCATAGGCTTT-3'     | RT-qPCR        |
| At1g72520        | <i>LOX4</i>              | Forward   | 5'-TCGCTAACTTTGGTGAGATCGATAG-3'     | RT-qPCR        |
|                  |                          | Reverse   | 5'-TCGTCATCTCGAAGCCATGCATATT-3'     | RT-qPCR        |
| At5g42650        | <i>AOS</i>               | Forward   | 5'-GGTGGCGAGGTTGTTTGTGA-3'          | RT-qPCR        |
|                  |                          | Reverse   | 5'-GCGACGTACCAACCTCAATATCA-3'       | RT-qPCR        |
| At2g06050        | <i>OPR3</i>              | Forward   | 5'-ACGGACCACTCCCGCGGTTTT-3'         | RT-qPCR        |
|                  |                          | Reverse   | 5'-CGTGAAGTCTCCACAAC-3'             | RT-qPCR        |
| At1g32640        | <i>MYC2</i>              | Forward   | 5'-CGCGAGTATGTCGGTGGTTA-3'          | RT-qPCR        |
|                  |                          | Reverse   | 5'-TGCTCTGAGCTGTTCTTGCGTATA-3'      | RT-qPCR        |
| At3g17860        | <i>JAZ3</i>              | Forward   | 5'-GTTCTACCAATGTAATGGCTCCAACA-3'    | RT-qPCR        |
|                  |                          | Reverse   | 5'-CAATATGGGGATACGCTCGT-3'          | RT-qPCR        |
| At5g13220        | <i>JAZ10</i>             | Forward   | 5'-AGCTCTTTGGCCAGAATCTAGA-3'        | RT-qPCR        |
|                  |                          | Reverse   | 5'-AGATGTTGATACTAATCTCTCCTTG-3'     | RT-qPCR        |
| At2g14610        | <i>PR-1</i>              | Forward   | 5'-CGTCTTTGTAGCTCTTGTAGGTGC-3'      | RT-qPCR        |
|                  |                          | Reverse   | 5'-TGCCTGGTTGTGAACCCTTAG-3'         | RT-qPCR        |
| At5g44420        | <i>PDF1.2a</i>           | Forward   | 5'-CTTGTTCTCTTTGCTGCTTTTCGAC-3'     | RT-qPCR        |
|                  |                          | Reverse   | 5'-TTGGCTCCTTCAAGGTTAATGCAC-3'      | RT-qPCR        |
| At3g23240        | <i>ERF1</i>              | Forward   | 5'-CGATCCCTAACCGAAAACAG-3'          | RT-qPCR        |
|                  |                          | Reverse   | 5'-TCCGATAGAATATTCCGGTGA-3'         | RT-qPCR        |
| At3g18780        | <i>ACTIN2</i>            | Forward   | 5'-ACCGTATGAGCAAAGAAATCAC-3'        | RT-qPCR        |
|                  |                          | Reverse   | 5'-GAGGGAAGCAAGAATGGAAC-3'          | RT-qPCR        |
| –                | T-DNA                    | –         | 5'-TGGTTCACGTAGTGGGCCATCG-3' (Lba1) | PCR genotyping |

<sup>a</sup> *Arabidopsis thaliana* gene identifier code assigned by the Arabidopsis Genome Initiatives (AGI; <https://www.arabidopsis.org/portals/nomenclature/>).

<sup>b</sup> Gene symbol as provided by The Arabidopsis Information Resource (TAIR; release 10; <https://www.arabidopsis.org/>) except for T-DNA of *Agrobacterium tumefaciens*.

**Table S2. LC-ESI-MS/MS parameters for jasmonate determination**

| Analyte             | Retention time on LC (min) | ESI mode | $[M-H]^{-1}$ ( $m/z$ ) | Transition ion ( $m/z$ ) | Collision energy (eV) | Fragmentor voltage (V) |
|---------------------|----------------------------|----------|------------------------|--------------------------|-----------------------|------------------------|
| JA                  | 14.4                       | negative | 209                    | 59                       | 15                    | 135                    |
| $[^2H_2]$ JA        | 14.4                       | negative | 211                    | 59                       | 15                    | 135                    |
| JA-Ile              | 18.0                       | negative | 322.0                  | 130                      | 14                    | 140                    |
| $[^{13}C_6]$ JA-Ile | 18.0                       | negative | 328.4                  | 136.2                    | 14                    | 140                    |



**Table S3. Genes with significantly increased expression in the *aln-1* mutant.**

Listed are those whose changes in transcript levels increased by equal to or greater than 3-fold, with the statistical significance level of 0.001 by a two-way analysis of variance (ANOVA). These genes were selected from the revised microarray data (Gene Expression Omnibus accession number GSE73841) that had been parametrically renormalized using the SuperNORM data service (Skylight Biotech Inc, Akita, Japan), according to the three-parameter lognormal distribution method (Konishi 2004).

| Affymetrix probe ID | AGI <sup>a</sup> | Fold change <sup>b</sup> | Gene symbol and description <sup>c</sup>                                                                                                                                                                                                                                                                                                                                                                                                                                                                                                                                                                                             | P-value <sup>d</sup> |
|---------------------|------------------|--------------------------|--------------------------------------------------------------------------------------------------------------------------------------------------------------------------------------------------------------------------------------------------------------------------------------------------------------------------------------------------------------------------------------------------------------------------------------------------------------------------------------------------------------------------------------------------------------------------------------------------------------------------------------|----------------------|
| 248727_at           | At5g47990        | 37.17                    | CYP705A5, THAD, THAD1, cytochrome P450, family 705, subfamily A, polypeptide 5                                                                                                                                                                                                                                                                                                                                                                                                                                                                                                                                                       | 1.331E-06            |
| 252368_at           | At3g48520        | 30.04                    | CYP94B3, cytochrome P450, family 94, subfamily B, polypeptide 3                                                                                                                                                                                                                                                                                                                                                                                                                                                                                                                                                                      | 1.282E-08            |
| 256601_s_at         | At3g28290        | 18.06                    | AT14A, Protein of unknown function (DUF677)                                                                                                                                                                                                                                                                                                                                                                                                                                                                                                                                                                                          | 1.411E-22            |
| 264415_at           | At1g43160        | 16.76                    | RAP2.6, related to AP2 6                                                                                                                                                                                                                                                                                                                                                                                                                                                                                                                                                                                                             | 1.831E-14            |
| 267147_at           | At2g38240        | 16.69                    | 2-oxoglutarate (2OG) and Fe(II)-dependent oxygenase superfamily protein                                                                                                                                                                                                                                                                                                                                                                                                                                                                                                                                                              | 3.205E-09            |
| 246340_s_at         | At3g44860        | 14.61                    | FAMT, farnesoic acid carboxyl-O-methyltransferase                                                                                                                                                                                                                                                                                                                                                                                                                                                                                                                                                                                    | 1.956E-21            |
| 249812_at           | At5g23830        | 13.24                    | MD-2-related lipid recognition domain-containing protein                                                                                                                                                                                                                                                                                                                                                                                                                                                                                                                                                                             | 3.712E-16            |
| 263023_at           | At1g23960        | 12.60                    | Protein of unknown function (DUF626)                                                                                                                                                                                                                                                                                                                                                                                                                                                                                                                                                                                                 | 6.221E-08            |
| 255065_s_at         | At4g08870        | 12.06                    | Arginase/deacetylase superfamily protein                                                                                                                                                                                                                                                                                                                                                                                                                                                                                                                                                                                             | 2.889E-26            |
| 265119_at           | At1g62570        | 11.83                    | FMO GS-OX4, flavin-monooxygenase glucosinolate S-oxygenase 4                                                                                                                                                                                                                                                                                                                                                                                                                                                                                                                                                                         | 6.567E-13            |
| 248944_at           | At5g45500        | 11.47                    | RNI-like superfamily protein                                                                                                                                                                                                                                                                                                                                                                                                                                                                                                                                                                                                         | 2.861E-06            |
| 247360_at           | At5g63450        | 11.44                    | CYP94B1, cytochrome P450, family 94, subfamily B, polypeptide 1                                                                                                                                                                                                                                                                                                                                                                                                                                                                                                                                                                      | 5.902E-14            |
| 255257_at           | At4g05050        | 10.42                    | UBQ11, ubiquitin 11                                                                                                                                                                                                                                                                                                                                                                                                                                                                                                                                                                                                                  | 2.298E-25            |
| 261804_at           | At1g30530        | 10.36                    | UGT78D1, UDP-glucosyl transferase 78D1                                                                                                                                                                                                                                                                                                                                                                                                                                                                                                                                                                                               | 1.783E-21            |
| 266271_at           | At2g29440        | 9.53                     | ATGSTU6, GST24, GSTU6, glutathione S-transferase tau 6                                                                                                                                                                                                                                                                                                                                                                                                                                                                                                                                                                               | 1.447E-09            |
| 267261_at           | At2g23120        | 9.26                     | Late embryogenesis abundant protein, group 6                                                                                                                                                                                                                                                                                                                                                                                                                                                                                                                                                                                         | 2.610E-14            |
| 256497_at           | At1g31580        | 9.03                     | CXC750, ECS1, ECS1                                                                                                                                                                                                                                                                                                                                                                                                                                                                                                                                                                                                                   | 1.596E-08            |
| 249600_s_at         | At5g38000        | 8.90                     | Zinc-binding dehydrogenase family protein                                                                                                                                                                                                                                                                                                                                                                                                                                                                                                                                                                                            | 5.939E-04            |
| 252487_at           | At3g46660        | 8.73                     | UGT76E12, UDP-glucosyl transferase 76E12                                                                                                                                                                                                                                                                                                                                                                                                                                                                                                                                                                                             | 4.360E-12            |
| 254481_at           | At4g20480        | 8.62                     | Putative endonuclease or glycosyl hydrolase                                                                                                                                                                                                                                                                                                                                                                                                                                                                                                                                                                                          | 6.565E-10            |
| 247175_at           | At5g65280        | 8.21                     | GCL1, GCR2-like 1                                                                                                                                                                                                                                                                                                                                                                                                                                                                                                                                                                                                                    | 1.076E-13            |
| 266901_at           | At2g34600        | 7.87                     | JAZ7, TIFY5B, jasmonate-zim-domain protein 7                                                                                                                                                                                                                                                                                                                                                                                                                                                                                                                                                                                         | 4.125E-16            |
| 263673_at           | At2g04800        | 7.75                     | unknown protein; FUNCTIONS IN: molecular_function unknown; INVOLVED IN: N-terminal protein myristoylation; LOCATED IN: cellular_component unknown; EXPRESSED IN: hypocotyl, root; Has 4 Blast hits to 4 proteins in 1 species: Archae - 0; Bacteria - 0; Metazoa - 0; Fungi - 0; Plants - 4; Viruses - 0; Other Eukaryotes - 0 (source: NCBI BLink).                                                                                                                                                                                                                                                                                 | 3.573E-05            |
| 256114_at           | At1g16850        | 7.50                     | unknown protein; FUNCTIONS IN: molecular_function unknown; INVOLVED IN: response to salt stress; LOCATED IN: endomembrane system; EXPRESSED IN: leaf apex, leaf whorl, male gametophyte, flower, leaf; EXPRESSED DURING: LP.06 six leaves visible, LP.04 four leaves visible, LP.10 ten leaves visible, petal differentiation and expansion stage, LP.08 eight leaves visible; BEST Arabidopsis thaliana protein match is: unknown protein (TAIR:AT5G64820.1); Has 24 Blast hits to 24 proteins in 6 species: Archae - 0; Bacteria - 0; Metazoa - 0; Fungi - 0; Plants - 24; Viruses - 0; Other Eukaryotes - 0 (source: NCBI BLink). | 6.812E-24            |
| 249599_at           | At5g37990        | 7.10                     | S-adenosyl-L-methionine-dependent methyltransferases superfamily protein                                                                                                                                                                                                                                                                                                                                                                                                                                                                                                                                                             | 2.658E-11            |
| 253104_at           | At4g36010        | 7.06                     | Pathogenesis-related thaumatin superfamily protein                                                                                                                                                                                                                                                                                                                                                                                                                                                                                                                                                                                   | 1.523E-16            |
| 263320_at           | At2g47180        | 7.02                     | AtGolS1, GolS1, galactinol synthase 1                                                                                                                                                                                                                                                                                                                                                                                                                                                                                                                                                                                                | 4.882E-18            |
| 249567_at           | At5g38020        | 6.81                     | S-adenosyl-L-methionine-dependent methyltransferases superfamily protein                                                                                                                                                                                                                                                                                                                                                                                                                                                                                                                                                             | 7.348E-16            |
| 263594_at           | At2g01880        | 6.70                     | ATPAP7, PAP7, purple acid phosphatase 7                                                                                                                                                                                                                                                                                                                                                                                                                                                                                                                                                                                              | 5.248E-11            |
| 260744_at           | At1g15010        | 6.68                     | unknown protein; BEST Arabidopsis thaliana protein match is: unknown protein (TAIR:AT2G01300.1); Has 71 Blast hits to 71 proteins in 13 species: Archae - 0; Bacteria - 2; Metazoa - 0; Fungi - 0; Plants - 69; Viruses - 0; Other Eukaryotes - 0 (source: NCBI BLink).                                                                                                                                                                                                                                                                                                                                                              | 7.417E-08            |
| 245689_at           | At5g04120        | 6.23                     | Phosphoglycerate mutase family protein                                                                                                                                                                                                                                                                                                                                                                                                                                                                                                                                                                                               | 4.586E-14            |
| 248205_at           | At5g54300        | 6.15                     | Protein of unknown function (DUF761)                                                                                                                                                                                                                                                                                                                                                                                                                                                                                                                                                                                                 | 9.230E-12            |
| 265615_at           | At2g25450        | 6.03                     | 2-oxoglutarate (2OG) and Fe(II)-dependent oxygenase superfamily protein                                                                                                                                                                                                                                                                                                                                                                                                                                                                                                                                                              | 1.288E-09            |
| 251513_at           | At3g59220        | 5.98                     | ATPIRIN1, PRN, PRN1, pirin                                                                                                                                                                                                                                                                                                                                                                                                                                                                                                                                                                                                           | 2.923E-25            |
| 245444_at           | At4g16740        | 5.97                     | ATTPS03, TPS03, terpene synthase 03                                                                                                                                                                                                                                                                                                                                                                                                                                                                                                                                                                                                  | 1.499E-11            |
| 246825_at           | At5g26260        | 5.91                     | TRAF-like family protein                                                                                                                                                                                                                                                                                                                                                                                                                                                                                                                                                                                                             | 9.195E-12            |
| 247136_at           | At5g66170        | 5.87                     | STR18, sulfurtransferase 18                                                                                                                                                                                                                                                                                                                                                                                                                                                                                                                                                                                                          | 4.901E-16            |
| 259286_at           | At3g11480        | 5.84                     | ATBSMT1, BSMT1, S-adenosyl-L-methionine-dependent methyltransferases superfamily protein                                                                                                                                                                                                                                                                                                                                                                                                                                                                                                                                             | 2.060E-24            |
| 260549_at           | At2g43535        | 5.84                     | Scorpion toxin-like knottin superfamily protein                                                                                                                                                                                                                                                                                                                                                                                                                                                                                                                                                                                      | 4.788E-13            |
| 263482_at           | At2g03980        | 5.82                     | GDSL-like Lipase/Acylhydrolase superfamily protein                                                                                                                                                                                                                                                                                                                                                                                                                                                                                                                                                                                   | 1.014E-25            |
| 248392_at           | At5g52050        | 5.71                     | MATE efflux family protein                                                                                                                                                                                                                                                                                                                                                                                                                                                                                                                                                                                                           | 1.438E-09            |
| 245555_at           | At4g15390        | 5.70                     | HXXXD-type acyl-transferase family protein                                                                                                                                                                                                                                                                                                                                                                                                                                                                                                                                                                                           | 4.897E-16            |
| 266743_at           | At2g02990        | 5.64                     | ATRNS1, RNS1, ribonuclease 1                                                                                                                                                                                                                                                                                                                                                                                                                                                                                                                                                                                                         | 5.145E-10            |
| 265530_at           | At2g06050        | 5.59                     | DDE1, OPR3, oxophytodienoate-reductase 3                                                                                                                                                                                                                                                                                                                                                                                                                                                                                                                                                                                             | 2.070E-17            |
| 250793_at           | At5g05600        | 5.56                     | 2-oxoglutarate (2OG) and Fe(II)-dependent oxygenase superfamily protein                                                                                                                                                                                                                                                                                                                                                                                                                                                                                                                                                              | 5.826E-15            |
| 251356_at           | At3g61060        | 5.53                     | AtPP2-A13, PP2-A13, phloem protein 2-A13                                                                                                                                                                                                                                                                                                                                                                                                                                                                                                                                                                                             | 2.022E-16            |
| 246488_at           | At5g16010        | 5.52                     | 3-oxo-5-alpha-steroid 4-dehydrogenase family protein                                                                                                                                                                                                                                                                                                                                                                                                                                                                                                                                                                                 | 2.942E-12            |
| 245928_s_at         | At5g24780        | 5.47                     | ATVSP1, VSP1, vegetative storage protein 1                                                                                                                                                                                                                                                                                                                                                                                                                                                                                                                                                                                           | 3.363E-22            |
| 247600_at           | At5g60890        | 5.40                     | ATMYB34, ATR1, MYB34, myb domain protein 34                                                                                                                                                                                                                                                                                                                                                                                                                                                                                                                                                                                          | 9.715E-13            |
| 266246_at           | At2g27690        | 5.38                     | CYP94C1, cytochrome P450, family 94, subfamily C, polypeptide 1                                                                                                                                                                                                                                                                                                                                                                                                                                                                                                                                                                      | 1.253E-12            |
| 252102_at           | At3g50970        | 5.37                     | LTI30, XERO2, dehydrin family protein                                                                                                                                                                                                                                                                                                                                                                                                                                                                                                                                                                                                | 4.219E-11            |
| 251241_s_at         | At3g62460        | 5.37                     | Putative endonuclease or glycosyl hydrolase                                                                                                                                                                                                                                                                                                                                                                                                                                                                                                                                                                                          | 9.894E-20            |
| 245713_at           | At5g04370        | 5.34                     | NAMT1, S-adenosyl-L-methionine-dependent methyltransferases superfamily protein                                                                                                                                                                                                                                                                                                                                                                                                                                                                                                                                                      | 1.362E-06            |
| 267411_at           | At2g34930        | 5.34                     | disease resistance family protein / LRR family protein                                                                                                                                                                                                                                                                                                                                                                                                                                                                                                                                                                               | 4.288E-11            |
| 263083_at           | At2g27190        | 5.31                     | ATPAP1, ATPAP12, PAP1, PAP12, purple acid phosphatase 12                                                                                                                                                                                                                                                                                                                                                                                                                                                                                                                                                                             | 6.013E-21            |
| 245749_at           | At1g51090        | 5.29                     | Heavy metal transport/detoxification superfamily protein                                                                                                                                                                                                                                                                                                                                                                                                                                                                                                                                                                             | 6.242E-13            |
| 250662_at           | At5g07010        | 5.22                     | ATST2A, ST2A, sulfotransferase 2A                                                                                                                                                                                                                                                                                                                                                                                                                                                                                                                                                                                                    | 1.799E-06            |
| 264886_at           | At1g61120        | 5.22                     | GES, TPS04, TPS4, terpene synthase 04                                                                                                                                                                                                                                                                                                                                                                                                                                                                                                                                                                                                | 1.201E-08            |
| 259846_at           | At1g72140        | 5.22                     | Major facilitator superfamily protein                                                                                                                                                                                                                                                                                                                                                                                                                                                                                                                                                                                                | 2.148E-11            |

|             |           |      |                                                                                                                                                                                                                                                                                                                                                                                                                                                                                             |           |
|-------------|-----------|------|---------------------------------------------------------------------------------------------------------------------------------------------------------------------------------------------------------------------------------------------------------------------------------------------------------------------------------------------------------------------------------------------------------------------------------------------------------------------------------------------|-----------|
| 261919_at   | At1g65980 | 5.21 | TPX1, thioredoxin-dependent peroxidase 1                                                                                                                                                                                                                                                                                                                                                                                                                                                    | 4.164E-11 |
| 261037_at   | At1g17420 | 5.19 | LOX3, lipoxygenase 3                                                                                                                                                                                                                                                                                                                                                                                                                                                                        | 1.737E-22 |
| 248337_at   | At5g52310 | 5.11 | COR78, LTI140, LTI78, RD29A, low-temperature-responsive protein 78 (LTI78) / desiccation-responsive protein 29A (RD29A)                                                                                                                                                                                                                                                                                                                                                                     | 1.912E-13 |
| 257638_at   | At3g25820 | 5.06 | ATPS-CIN, TPS-CIN, terpene synthase-like sequence-1,8-cineole                                                                                                                                                                                                                                                                                                                                                                                                                               | 3.374E-19 |
| 266799_at   | At2g22860 | 5.06 | ATPSK2, PSK2, phytosulfokine 2 precursor                                                                                                                                                                                                                                                                                                                                                                                                                                                    | 3.091E-09 |
| 262226_at   | At1g53885 | 4.94 | Protein of unknown function (DUF581)                                                                                                                                                                                                                                                                                                                                                                                                                                                        | 4.589E-07 |
| 249971_at   | At5g19110 | 4.92 | Eukaryotic aspartyl protease family protein                                                                                                                                                                                                                                                                                                                                                                                                                                                 | 3.110E-16 |
| 256324_at   | At1g66760 | 4.87 | MATE efflux family protein                                                                                                                                                                                                                                                                                                                                                                                                                                                                  | 1.026E-06 |
| 249101_at   | At5g43580 | 4.74 | Serine protease inhibitor, potato inhibitor I-type family protein                                                                                                                                                                                                                                                                                                                                                                                                                           | 1.325E-06 |
| 250292_at   | At5g13220 | 4.73 | JAS1, JAZ10, TIFY9, jasmonate-zim-domain protein 10                                                                                                                                                                                                                                                                                                                                                                                                                                         | 5.410E-15 |
| 255527_at   | At4g02360 | 4.67 | Protein of unknown function, DUF538                                                                                                                                                                                                                                                                                                                                                                                                                                                         | 5.697E-16 |
| 260969_at   | At1g12240 | 4.64 | ATBETAFRUCT4, VAC-INV, Glycosyl hydrolases family 32 protein                                                                                                                                                                                                                                                                                                                                                                                                                                | 1.631E-20 |
| 255132_at   | At4g08170 | 4.61 | Inositol 1,3,4-trisphosphate 5/6-kinase family protein                                                                                                                                                                                                                                                                                                                                                                                                                                      | 9.523E-16 |
| 264146_at   | At1g02205 | 4.58 | CER1, Fatty acid hydroxylase superfamily                                                                                                                                                                                                                                                                                                                                                                                                                                                    | 1.358E-10 |
| 252377_at   | At3g47960 | 4.58 | Major facilitator superfamily protein                                                                                                                                                                                                                                                                                                                                                                                                                                                       | 9.941E-12 |
| 251023_at   | At5g02170 | 4.56 | Transmembrane amino acid transporter family protein                                                                                                                                                                                                                                                                                                                                                                                                                                         | 2.740E-06 |
| 260012_at   | At1g67865 | 4.56 | unknown protein; BEST Arabidopsis thaliana protein match is: unknown protein (TAIR:AT1G67860.1); Has 13 Blast hits to 13 proteins in 2 species: Archae - 0; Bacteria - 0; Metazoa - 0; Fungi - 0; Plants - 13; Viruses - 0; Other Eukaryotes - 0 (source: NCBI BLink).                                                                                                                                                                                                                      | 1.160E-12 |
| 266800_at   | At2g22880 | 4.53 | VQ motif-containing protein                                                                                                                                                                                                                                                                                                                                                                                                                                                                 | 2.547E-09 |
| 254085_at   | At4g24960 | 4.51 | ATHVA22D, HVA22D, HVA22 homologue D                                                                                                                                                                                                                                                                                                                                                                                                                                                         | 1.755E-15 |
| 264953_at   | At1g77120 | 4.49 | ADH, ADH1, ATADH, ATADH1, alcohol dehydrogenase 1                                                                                                                                                                                                                                                                                                                                                                                                                                           | 2.059E-15 |
| 250648_at   | At5g06760 | 4.45 | LEA4-5, Late Embryogenesis Abundant 4-5                                                                                                                                                                                                                                                                                                                                                                                                                                                     | 1.309E-13 |
| 254326_at   | At4g22610 | 4.45 | Bifunctional inhibitor/lipid-transfer protein/seed storage 2S albumin superfamily protein                                                                                                                                                                                                                                                                                                                                                                                                   | 5.600E-10 |
| 265698_at   | At2g32160 | 4.30 | S-adenosyl-L-methionine-dependent methyltransferases superfamily protein                                                                                                                                                                                                                                                                                                                                                                                                                    | 1.780E-07 |
| 247933_at   | At5g56980 | 4.29 | unknown protein; FUNCTIONS IN: molecular_function unknown; INVOLVED IN: biological_process unknown; LOCATED IN: endomembrane system; EXPRESSED IN: 18 plant structures; EXPRESSED DURING: 12 growth stages; BEST Arabidopsis thaliana protein match is: unknown protein (TAIR:AT4G26130.1); Has 30201 Blast hits to 17322 proteins in 780 species: Archae - 12; Bacteria - 1396; Metazoa - 17338; Fungi - 3422; Plants - 5037; Viruses - 0; Other Eukaryotes - 2996 (source: NCBI BLink).   | 9.334E-12 |
| 256417_s_at | At3g11170 | 4.27 | FAD7, FADD, fatty acid desaturase 7                                                                                                                                                                                                                                                                                                                                                                                                                                                         | 9.180E-14 |
| 245449_at   | At4g16870 | 4.25 | transposable element gene                                                                                                                                                                                                                                                                                                                                                                                                                                                                   | 1.839E-09 |
| 260399_at   | At1g72520 | 4.20 | PLAT/LH2 domain-containing lipoxygenase family protein                                                                                                                                                                                                                                                                                                                                                                                                                                      | 6.363E-16 |
| 258893_at   | At3g05660 | 4.18 | AtRLP33, RLP33, receptor like protein 33                                                                                                                                                                                                                                                                                                                                                                                                                                                    | 4.862E-12 |
| 262496_at   | At1g21790 | 4.17 | TRAM, LAG1 and CLN8 (TLC) lipid-sensing domain containing protein                                                                                                                                                                                                                                                                                                                                                                                                                           | 2.605E-19 |
| 264527_at   | At1g30760 | 4.17 | FAD-binding Berberine family protein                                                                                                                                                                                                                                                                                                                                                                                                                                                        | 2.771E-08 |
| 251984_at   | At3g53260 | 4.16 | ATPAL2, PAL2, phenylalanine ammonia-lyase 2                                                                                                                                                                                                                                                                                                                                                                                                                                                 | 2.247E-12 |
| 255942_at   | At1g22360 | 4.12 | AtUGT85A2, UGT85A2, UDP-glucosyl transferase 85A2                                                                                                                                                                                                                                                                                                                                                                                                                                           | 7.535E-13 |
| 248978_at   | At5g45070 | 4.09 | AtPP2-A8, PP2-A8, phloem protein 2-A8                                                                                                                                                                                                                                                                                                                                                                                                                                                       | 7.511E-05 |
| 266486_at   | At2g47950 | 4.07 | unknown protein; FUNCTIONS IN: molecular_function unknown; INVOLVED IN: biological_process unknown; LOCATED IN: endomembrane system; EXPRESSED IN: root, flower; EXPRESSED DURING: petal differentiation and expansion stage; BEST Arabidopsis thaliana protein match is: unknown protein (TAIR:AT3G62990.1); Has 22 Blast hits to 22 proteins in 5 species: Archae - 0; Bacteria - 0; Metazoa - 0; Fungi - 0; Plants - 22; Viruses - 0; Other Eukaryotes - 0 (source: NCBI BLink).         | 2.353E-07 |
| 262010_at   | At1g35612 | 4.07 | transposable element gene                                                                                                                                                                                                                                                                                                                                                                                                                                                                   | 5.905E-06 |
| 263161_at   | At1g54020 | 4.06 | GDSL-like Lipase/Acylhydrolase superfamily protein                                                                                                                                                                                                                                                                                                                                                                                                                                          | 1.533E-12 |
| 245628_at   | At1g56650 | 4.05 | ATMYB75, MYB75, PAP1, SIAA1, production of anthocyanin pigment 1                                                                                                                                                                                                                                                                                                                                                                                                                            | 2.806E-08 |
| 260557_at   | At2g43610 | 4.04 | Chitinase family protein                                                                                                                                                                                                                                                                                                                                                                                                                                                                    | 6.695E-19 |
| 258941_at   | At3g09940 | 4.03 | ATMDAR3, MDAR2, MDAR3, MDHAR, monodehydroascorbate reductase                                                                                                                                                                                                                                                                                                                                                                                                                                | 1.933E-08 |
| 246125_at   | At5g19875 | 4.03 | unknown protein; FUNCTIONS IN: molecular_function unknown; INVOLVED IN: response to oxidative stress; LOCATED IN: endomembrane system; EXPRESSED IN: 21 plant structures; EXPRESSED DURING: 13 growth stages; BEST Arabidopsis thaliana protein match is: unknown protein (TAIR:AT2G31940.1); Has 30201 Blast hits to 17322 proteins in 780 species: Archae - 12; Bacteria - 1396; Metazoa - 17338; Fungi - 3422; Plants - 5037; Viruses - 0; Other Eukaryotes - 2996 (source: NCBI BLink). | 3.758E-16 |
| 245736_at   | At1g73330 | 4.03 | ATDR4, DR4, drought-repressed 4                                                                                                                                                                                                                                                                                                                                                                                                                                                             | 8.670E-15 |
| 248293_at   | At5g53050 | 3.98 | alpha/beta-Hydrolases superfamily protein                                                                                                                                                                                                                                                                                                                                                                                                                                                   | 5.520E-14 |
| 258181_at   | At3g21670 | 3.95 | Major facilitator superfamily protein                                                                                                                                                                                                                                                                                                                                                                                                                                                       | 9.060E-16 |
| 254561_at   | At4g19160 | 3.95 | unknown protein; Has 30201 Blast hits to 17322 proteins in 780 species: Archae - 12; Bacteria - 1396; Metazoa - 17338; Fungi - 3422; Plants - 5037; Viruses - 0; Other Eukaryotes - 2996 (source: NCBI BLink).                                                                                                                                                                                                                                                                              | 4.712E-21 |
| 245651_s_at | At1g24793 | 3.92 | UDP-3-O-acyl N-acetylglucosamine deacetylase family protein                                                                                                                                                                                                                                                                                                                                                                                                                                 | 3.960E-25 |
| 267206_at   | At2g30830 | 3.92 | 2-oxoglutarate (2OG) and Fe(II)-dependent oxygenase superfamily protein                                                                                                                                                                                                                                                                                                                                                                                                                     | 5.079E-05 |
| 262637_at   | At1g06640 | 3.91 | 2-oxoglutarate (2OG) and Fe(II)-dependent oxygenase superfamily protein                                                                                                                                                                                                                                                                                                                                                                                                                     | 2.945E-14 |
| 258421_at   | At3g16690 | 3.90 | Nodulin MtN3 family protein                                                                                                                                                                                                                                                                                                                                                                                                                                                                 | 1.718E-06 |
| 258321_at   | At3g22840 | 3.89 | ELIP, ELIP1, Chlorophyll A-B binding family protein                                                                                                                                                                                                                                                                                                                                                                                                                                         | 9.380E-09 |
| 262887_at   | At1g14780 | 3.88 | MAC/Perforin domain-containing protein                                                                                                                                                                                                                                                                                                                                                                                                                                                      | 5.670E-07 |
| 249216_at   | At5g42240 | 3.88 | scpl42, serine carboxypeptidase-like 42                                                                                                                                                                                                                                                                                                                                                                                                                                                     | 5.393E-09 |
| 246286_at   | At1g31910 | 3.88 | GHMP kinase family protein                                                                                                                                                                                                                                                                                                                                                                                                                                                                  | 1.332E-22 |
| 254667_at   | At4g18280 | 3.88 | glycine-rich cell wall protein-related                                                                                                                                                                                                                                                                                                                                                                                                                                                      | 2.040E-15 |
| 252170_at   | At3g50480 | 3.86 | HR4, homolog of RPW8 4                                                                                                                                                                                                                                                                                                                                                                                                                                                                      | 1.208E-10 |
| 255403_at   | At4g03400 | 3.84 | DFL2, GH3-10, Auxin-responsive GH3 family protein                                                                                                                                                                                                                                                                                                                                                                                                                                           | 9.628E-16 |
| 245244_at   | At1g44350 | 3.83 | ILL6, IAA-leucine resistant (ILR)-like gene 6                                                                                                                                                                                                                                                                                                                                                                                                                                               | 4.611E-14 |
| 264424_at   | At1g61740 | 3.83 | Sulfite exporter TauE/SafE family protein                                                                                                                                                                                                                                                                                                                                                                                                                                                   | 3.458E-17 |
| 253259_at   | At4g34410 | 3.81 | RRTF1, redox responsive transcription factor 1                                                                                                                                                                                                                                                                                                                                                                                                                                              | 1.297E-05 |

|             |           |      |                                                                                                                                                                                                                                                                                                                                                                                                                                                                                           |           |
|-------------|-----------|------|-------------------------------------------------------------------------------------------------------------------------------------------------------------------------------------------------------------------------------------------------------------------------------------------------------------------------------------------------------------------------------------------------------------------------------------------------------------------------------------------|-----------|
| 248079_at   | At5g55790 | 3.80 | unknown protein; BEST Arabidopsis thaliana protein match is: unknown protein (TAIR:AT1G45163.1); Has 1807 Blast hits to 1807 proteins in 277 species: Archae - 0; Bacteria - 0; Metazoa - 736; Fungi - 347; Plants - 385; Viruses - 0; Other Eukaryotes - 339 (source: NCBI BLink).                                                                                                                                                                                                       | 9.744E-06 |
| 246987_at   | At5g67300 | 3.79 | ATMYB44, ATMYBR1, MYB44, MYBR1, myb domain protein r1                                                                                                                                                                                                                                                                                                                                                                                                                                     | 2.831E-14 |
| 267058_at   | At2g32510 | 3.78 | MAPKKK17, mitogen-activated protein kinase kinase kinase 17                                                                                                                                                                                                                                                                                                                                                                                                                               | 4.132E-15 |
| 256994_s_at | At3g25830 | 3.77 | ATTPS-CIN, TPS-CIN, TPS-CIN, terpene synthase-like sequence-1,8-cineole                                                                                                                                                                                                                                                                                                                                                                                                                   | 1.801E-16 |
| 264787_at   | At2g17840 | 3.76 | ERD7, Senescence/dehydration-associated protein-related                                                                                                                                                                                                                                                                                                                                                                                                                                   | 7.595E-15 |
| 249010_at   | At5g44580 | 3.73 | unknown protein; FUNCTIONS IN: molecular_function unknown; INVOLVED IN: biological_process unknown; LOCATED IN: endomembrane system; EXPRESSED IN: 18 plant structures; EXPRESSED DURING: 12 growth stages; BEST Arabidopsis thaliana protein match is: unknown protein (TAIR:AT5G44582.1); Has 30201 Blast hits to 17322 proteins in 780 species: Archae - 12; Bacteria - 1396; Metazoa - 17338; Fungi - 3422; Plants - 5037; Viruses - 0; Other Eukaryotes - 2996 (source: NCBI BLink). | 1.500E-18 |
| 245450_at   | At4g16880 | 3.72 | Leucine-rich repeat (LRR) family protein                                                                                                                                                                                                                                                                                                                                                                                                                                                  | 2.548E-06 |
| 253814_at   | At4g28290 | 3.69 | unknown protein; FUNCTIONS IN: molecular_function unknown; INVOLVED IN: biological_process unknown; LOCATED IN: chloroplast; EXPRESSED IN: 23 plant structures; EXPRESSED DURING: 15 growth stages; Has 45 Blast hits to 45 proteins in 11 species: Archae - 0; Bacteria - 0; Metazoa - 0; Fungi - 0; Plants - 45; Viruses - 0; Other Eukaryotes - 0 (source: NCBI BLink).                                                                                                                | 7.458E-08 |
| 247982_at   | At5g56760 | 3.69 | ATSERAT1;1, SAT-52, SAT5, SERAT1;1, serine acetyltransferase 1;1                                                                                                                                                                                                                                                                                                                                                                                                                          | 2.241E-15 |
| 248522_at   | At5g50565 | 3.69 | unknown protein; BEST Arabidopsis thaliana protein match is: unknown protein (TAIR:AT5G50665.2); Has 6 Blast hits to 6 proteins in 1 species: Archae - 0; Bacteria - 0; Metazoa - 0; Fungi - 0; Plants - 6; Viruses - 0; Other Eukaryotes - 0 (source: NCBI BLink).                                                                                                                                                                                                                       | 7.287E-08 |
| 246432_at   | At5g17490 | 3.68 | RGL3, RGA-like protein 3                                                                                                                                                                                                                                                                                                                                                                                                                                                                  | 2.466E-09 |
| 251642_at   | At3g57520 | 3.67 | AtSIP2, SIP2, seed imbibition 2                                                                                                                                                                                                                                                                                                                                                                                                                                                           | 1.617E-12 |
| 256725_at   | At2g34070 | 3.67 | TBL37, TRICHOME BIREFRINGENCE-LIKE 37                                                                                                                                                                                                                                                                                                                                                                                                                                                     | 2.501E-15 |
| 263098_at   | At2g16005 | 3.67 | MD-2-related lipid recognition domain-containing protein                                                                                                                                                                                                                                                                                                                                                                                                                                  | 9.852E-09 |
| 262517_at   | At1g17180 | 3.66 | ATGSTU25, GSTU25, glutathione S-transferase TAU 25                                                                                                                                                                                                                                                                                                                                                                                                                                        | 3.372E-05 |
| 259802_at   | At1g72260 | 3.65 | THI2.1, THI2.1.1, thionin 2.1                                                                                                                                                                                                                                                                                                                                                                                                                                                             | 1.612E-13 |
| 254306_at   | At4g22330 | 3.64 | ATCES1, Alkaline phytoceramidase (aPHC)                                                                                                                                                                                                                                                                                                                                                                                                                                                   | 7.765E-14 |
| 248790_at   | At5g47450 | 3.63 | ATTIP2;3, DELTA-TIP3, TIP2;3, tonoplast intrinsic protein 2;3                                                                                                                                                                                                                                                                                                                                                                                                                             | 7.061E-13 |
| 263497_at   | At2g42540 | 3.61 | COR15, COR15A, cold-regulated 15a                                                                                                                                                                                                                                                                                                                                                                                                                                                         | 6.977E-23 |
| 252563_at   | At3g45970 | 3.60 | ATEXLA1, ATEXPL1, ATHEXP BETA 2.1, EXLA1, EXPL1, expansin-like A1                                                                                                                                                                                                                                                                                                                                                                                                                         | 3.517E-14 |
| 247478_at   | At5g62360 | 3.58 | Plant invertase/pectin methylesterase inhibitor superfamily protein                                                                                                                                                                                                                                                                                                                                                                                                                       | 5.862E-08 |
| 257952_at   | At3g21770 | 3.56 | Peroxidase superfamily protein                                                                                                                                                                                                                                                                                                                                                                                                                                                            | 4.333E-12 |
| 264835_at   | At1g03550 | 3.56 | Secretory carrier membrane protein (SCAMP) family protein                                                                                                                                                                                                                                                                                                                                                                                                                                 | 7.277E-17 |
| 251012_at   | At5g02580 | 3.55 | Plant protein 1589 of unknown function                                                                                                                                                                                                                                                                                                                                                                                                                                                    | 4.499E-06 |
| 259442_at   | At1g02310 | 3.53 | MAN1, Glycosyl hydrolase superfamily protein                                                                                                                                                                                                                                                                                                                                                                                                                                              | 4.281E-12 |
| 259758_s_at | At1g77530 | 3.52 | O-methyltransferase family protein                                                                                                                                                                                                                                                                                                                                                                                                                                                        | 2.696E-10 |
| 251229_at   | At3g62740 | 3.51 | BGLU7, beta glucosidase 7                                                                                                                                                                                                                                                                                                                                                                                                                                                                 | 1.563E-04 |
| 256577_at   | At3g28220 | 3.51 | TRAF-like family protein                                                                                                                                                                                                                                                                                                                                                                                                                                                                  | 2.151E-09 |
| 261199_at   | At1g12950 | 3.46 | RSH2, root hair specific 2                                                                                                                                                                                                                                                                                                                                                                                                                                                                | 4.890E-06 |
| 245734_at   | At1g73480 | 3.46 | alpha/beta-Hydrolases superfamily protein                                                                                                                                                                                                                                                                                                                                                                                                                                                 | 1.015E-15 |
| 264824_at   | At1g03420 | 3.46 | Sadhu4-2, transposable element gene                                                                                                                                                                                                                                                                                                                                                                                                                                                       | 4.057E-11 |
| 259516_at   | At1g20450 | 3.45 | ERD10, LTI29, LTI45, Dehydrin family protein                                                                                                                                                                                                                                                                                                                                                                                                                                              | 1.119E-09 |
| 250161_at   | At5g15240 | 3.45 | Transmembrane amino acid transporter family protein                                                                                                                                                                                                                                                                                                                                                                                                                                       | 4.298E-07 |
| 261033_at   | At1g17380 | 3.41 | JAZ5, TIFY11A, jasmonate-zim-domain protein 5                                                                                                                                                                                                                                                                                                                                                                                                                                             | 1.707E-15 |
| 262516_at   | At1g17190 | 3.41 | ATGSTU26, GSTU26, glutathione S-transferase tau 26                                                                                                                                                                                                                                                                                                                                                                                                                                        | 1.011E-08 |
| 251028_at   | At5g02230 | 3.41 | Haloacid dehalogenase-like hydrolase (HAD) superfamily protein                                                                                                                                                                                                                                                                                                                                                                                                                            | 2.489E-11 |
| 247431_at   | At5g62520 | 3.40 | SRO5, similar to RCD one 5                                                                                                                                                                                                                                                                                                                                                                                                                                                                | 1.320E-04 |
| 257497_at   | At1g51430 | 3.38 | unknown protein; BEST Arabidopsis thaliana protein match is: unknown protein (TAIR:AT3G28370.1); Has 13 Blast hits to 13 proteins in 4 species: Archae - 0; Bacteria - 0; Metazoa - 0; Fungi - 0; Plants - 13; Viruses - 0; Other Eukaryotes - 0 (source: NCBI BLink).                                                                                                                                                                                                                    | 7.165E-05 |
| 254809_at   | At4g12410 | 3.37 | SAUR-like auxin-responsive protein family                                                                                                                                                                                                                                                                                                                                                                                                                                                 | 2.623E-17 |
| 254447_at   | At4g20860 | 3.36 | FAD-binding Berberine family protein                                                                                                                                                                                                                                                                                                                                                                                                                                                      | 1.349E-04 |
| 256589_at   | At3g28740 | 3.34 | CYP81D1, Cytochrome P450 superfamily protein                                                                                                                                                                                                                                                                                                                                                                                                                                              | 3.269E-17 |
| 253832_at   | At4g27654 | 3.34 | unknown protein; FUNCTIONS IN: molecular_function unknown; INVOLVED IN: biological_process unknown; LOCATED IN: endomembrane system; EXPRESSED IN: 17 plant structures; EXPRESSED DURING: 9 growth stages; Has 30201 Blast hits to 17322 proteins in 780 species: Archae - 12; Bacteria - 1396; Metazoa - 17338; Fungi - 3422; Plants - 5037; Viruses - 0; Other Eukaryotes - 2996 (source: NCBI BLink).                                                                                  | 1.072E-05 |
| 260357_at   | At1g69260 | 3.32 | AFP1, ABI five binding protein                                                                                                                                                                                                                                                                                                                                                                                                                                                            | 6.224E-21 |
| 255723_at   | At3g29575 | 3.32 | AFP3, ABI five binding protein 3                                                                                                                                                                                                                                                                                                                                                                                                                                                          | 5.297E-23 |
| 258498_at   | At3g02480 | 3.30 | Late embryogenesis abundant protein (LEA) family protein                                                                                                                                                                                                                                                                                                                                                                                                                                  | 1.938E-07 |
| 266832_at   | At2g30040 | 3.29 | MAPKKK14, mitogen-activated protein kinase kinase kinase 14                                                                                                                                                                                                                                                                                                                                                                                                                               | 2.429E-11 |
| 258901_at   | At3g05640 | 3.28 | Protein phosphatase 2C family protein                                                                                                                                                                                                                                                                                                                                                                                                                                                     | 6.072E-21 |
| 254909_at   | At4g11210 | 3.27 | Disease resistance-responsive (dirigent-like protein) family protein                                                                                                                                                                                                                                                                                                                                                                                                                      | 2.215E-08 |
| 252677_at   | At3g44320 | 3.26 | AtNIT3, NIT3, nitrilase 3                                                                                                                                                                                                                                                                                                                                                                                                                                                                 | 5.307E-13 |
| 253827_at   | At4g28085 | 3.26 | unknown protein; Has 30201 Blast hits to 17322 proteins in 780 species: Archae - 12; Bacteria - 1396; Metazoa - 17338; Fungi - 3422; Plants - 5037; Viruses - 0; Other Eukaryotes - 2996 (source: NCBI BLink).                                                                                                                                                                                                                                                                            | 8.830E-13 |
| 264949_at   | At1g77080 | 3.25 | AGL27, FLM, MAF1, K-box region and MADS-box transcription factor family protein                                                                                                                                                                                                                                                                                                                                                                                                           | 1.637E-04 |
| 248524_s_at | At5g50570 | 3.24 | Squamosa promoter-binding protein-like (SBP domain) transcription factor family protein                                                                                                                                                                                                                                                                                                                                                                                                   | 7.795E-20 |
| 262912_at   | At1g59740 | 3.23 | Major facilitator superfamily protein                                                                                                                                                                                                                                                                                                                                                                                                                                                     | 2.947E-12 |
| 265305_at   | At2g20340 | 3.23 | Pyridoxal phosphate (PLP)-dependent transferases superfamily protein                                                                                                                                                                                                                                                                                                                                                                                                                      | 1.336E-13 |
| 249265_at   | At5g41700 | 3.22 | ATUBC8, UBC8, ubiquitin conjugating enzyme 8                                                                                                                                                                                                                                                                                                                                                                                                                                              | 1.413E-15 |
| 245944_at   | At5g19520 | 3.21 | ATMSL9, MSL9, mechanosensitive channel of small conductance-like 9                                                                                                                                                                                                                                                                                                                                                                                                                        | 7.007E-10 |
| 265188_at   | At1g23800 | 3.20 | ALDH2B, ALDH2B7, aldehyde dehydrogenase 2B7                                                                                                                                                                                                                                                                                                                                                                                                                                               | 5.979E-13 |
| 262133_at   | At1g78000 | 3.20 | SEL1, SULTR1;2, sulfate transporter 1;2                                                                                                                                                                                                                                                                                                                                                                                                                                                   | 3.125E-11 |

|             |           |      |                                                                                                                                                                                                                                                                                                                                                                                                                                                                                 |           |
|-------------|-----------|------|---------------------------------------------------------------------------------------------------------------------------------------------------------------------------------------------------------------------------------------------------------------------------------------------------------------------------------------------------------------------------------------------------------------------------------------------------------------------------------|-----------|
| 265216_at   | At1g05100 | 3.20 | MAPKKK18, mitogen-activated protein kinase kinase kinase 18                                                                                                                                                                                                                                                                                                                                                                                                                     | 6.727E-08 |
| 264289_at   | At1g61890 | 3.19 | MATE efflux family protein                                                                                                                                                                                                                                                                                                                                                                                                                                                      | 1.851E-13 |
| 252419_at   | At3g47510 | 3.18 | unknown protein; FUNCTIONS IN: molecular_function unknown; INVOLVED IN: biological_process unknown; LOCATED IN: endomembrane system; EXPRESSED IN: 19 plant structures; EXPRESSED DURING: 11 growth stages; Has 15 Blast hits to 15 proteins in 7 species: Archae - 0; Bacteria - 0; Metazoa - 0; Fungi - 0; Plants - 15; Viruses - 0; Other Eukaryotes - 0 (source: NCBI BLink).                                                                                               | 1.221E-17 |
| 253684_at   | At4g29690 | 3.18 | Alkaline-phosphatase-like family protein                                                                                                                                                                                                                                                                                                                                                                                                                                        | 9.631E-08 |
| 252076_at   | At3g51660 | 3.18 | Tautomerase/MIF superfamily protein                                                                                                                                                                                                                                                                                                                                                                                                                                             | 1.585E-17 |
| 255795_at   | At2g33380 | 3.17 | CLO-3, RD20, Caleosin-related family protein                                                                                                                                                                                                                                                                                                                                                                                                                                    | 4.371E-16 |
| 250781_at   | At5g05410 | 3.17 | DREB2, DREB2A, DRE-binding protein 2A                                                                                                                                                                                                                                                                                                                                                                                                                                           | 6.535E-14 |
| 260676_at   | At1g19450 | 3.15 | Major facilitator superfamily protein                                                                                                                                                                                                                                                                                                                                                                                                                                           | 1.216E-08 |
| 254996_at   | At4g10390 | 3.15 | Protein kinase superfamily protein                                                                                                                                                                                                                                                                                                                                                                                                                                              | 8.436E-17 |
| 263786_at   | At2g46370 | 3.14 | FIN219, JAR1, Auxin-responsive GH3 family protein                                                                                                                                                                                                                                                                                                                                                                                                                               | 1.050E-12 |
| 259705_at   | At1g77450 | 3.14 | anac032, NAC032, NAC domain containing protein 32                                                                                                                                                                                                                                                                                                                                                                                                                               | 7.980E-17 |
| 256848_at   | At3g27960 | 3.13 | Tetratricopeptide repeat (TPR)-like superfamily protein                                                                                                                                                                                                                                                                                                                                                                                                                         | 1.037E-10 |
| 264145_at   | At1g79310 | 3.13 | AtMC7, MC7, metacaspase 7                                                                                                                                                                                                                                                                                                                                                                                                                                                       | 4.761E-05 |
| 247717_at   | At5g59320 | 3.11 | LTP3, lipid transfer protein 3                                                                                                                                                                                                                                                                                                                                                                                                                                                  | 8.271E-07 |
| 262164_at   | At1g78070 | 3.11 | Transducin/WD40 repeat-like superfamily protein                                                                                                                                                                                                                                                                                                                                                                                                                                 | 5.182E-11 |
| 246235_at   | At4g36830 | 3.11 | HOS3-1, GNS1/SUR4 membrane protein family                                                                                                                                                                                                                                                                                                                                                                                                                                       | 1.024E-08 |
| 249205_at   | At5g42600 | 3.10 | MRN1, marneral synthase                                                                                                                                                                                                                                                                                                                                                                                                                                                         | 1.882E-13 |
| 264436_at   | At1g10370 | 3.09 | ATGSTU17, ERD9, GST30, GST30B, Glutathione S-transferase family protein                                                                                                                                                                                                                                                                                                                                                                                                         | 9.101E-09 |
| 247109_at   | At5g65870 | 3.09 | ATPSK5, PSK5, PSK5, phytosulfokine 5 precursor                                                                                                                                                                                                                                                                                                                                                                                                                                  | 1.305E-08 |
| 245267_at   | At4g14060 | 3.08 | Polyketide cyclase/dehydrase and lipid transport superfamily protein                                                                                                                                                                                                                                                                                                                                                                                                            | 1.080E-17 |
| 253872_at   | At4g27410 | 3.07 | ANAC072, RD26, NAC (No Apical Meristem) domain transcriptional regulator superfamily protein                                                                                                                                                                                                                                                                                                                                                                                    | 2.721E-20 |
| 265058_s_at | At1g52040 | 3.07 | ATMBP, MBP1, myrosinase-binding protein 1                                                                                                                                                                                                                                                                                                                                                                                                                                       | 3.468E-21 |
| 247026_at   | At5g67080 | 3.07 | MAPKKK19, mitogen-activated protein kinase kinase kinase 19                                                                                                                                                                                                                                                                                                                                                                                                                     | 5.392E-16 |
| 260205_at   | At1g70700 | 3.06 | JAZ9, TIFY7, TIFY domain/Divergent CCT motif family protein                                                                                                                                                                                                                                                                                                                                                                                                                     | 3.876E-15 |
| 251480_at   | At3g59710 | 3.06 | NAD(P)-binding Rossmann-fold superfamily protein                                                                                                                                                                                                                                                                                                                                                                                                                                | 4.978E-07 |
| 248625_at   | At5g48880 | 3.06 | KAT5, PKT1, PKT2, peroxisomal 3-keto-acyl-CoA thiolase 2                                                                                                                                                                                                                                                                                                                                                                                                                        | 7.153E-16 |
| 246376_at   | At1g51950 | 3.05 | IAA18, indole-3-acetic acid inducible 18                                                                                                                                                                                                                                                                                                                                                                                                                                        | 2.484E-15 |
| 262873_at   | At1g64700 | 3.04 | unknown protein; FUNCTIONS IN: molecular_function unknown; INVOLVED IN: N-terminal protein myristoylation; LOCATED IN: cellular_component unknown; EXPRESSED IN: 17 plant structures; EXPRESSED DURING: 11 growth stages; BEST Arabidopsis thaliana protein match is: unknown protein (TAIR:AT3G61920.1); Has 48 Blast hits to 47 proteins in 7 species: Archae - 0; Bacteria - 0; Metazoa - 0; Fungi - 0; Plants - 48; Viruses - 0; Other Eukaryotes - 0 (source: NCBI BLink). | 2.992E-04 |
| 245275_at   | At4g15210 | 3.04 | AT-BETA-AMY, ATBETA-AMY, BAM5, BMY1, RAM1, beta-amylase 5                                                                                                                                                                                                                                                                                                                                                                                                                       | 3.408E-20 |
| 248311_at   | At5g52570 | 3.03 | B2, BCH2, BETA-OHASE 2, CHY2, beta-carotene hydroxylase 2                                                                                                                                                                                                                                                                                                                                                                                                                       | 1.603E-12 |
| 266532_at   | At2g16890 | 3.03 | UDP-Glycosyltransferase superfamily protein                                                                                                                                                                                                                                                                                                                                                                                                                                     | 6.148E-06 |
| 263972_at   | At2g42760 | 3.02 | unknown protein; CONTAINS InterPro DOMAIN/s: Protein of unknown function DUF1685 (InterPro:IPR012881); Has 170 Blast hits to 164 proteins in 34 species: Archae - 0; Bacteria - 1; Metazoa - 26; Fungi - 10; Plants - 107; Viruses - 0; Other Eukaryotes - 26 (source: NCBI BLink).                                                                                                                                                                                             | 2.829E-18 |
| 259653_at   | At1g55240 | 3.01 | Family of unknown function (DUF716)                                                                                                                                                                                                                                                                                                                                                                                                                                             | 3.973E-13 |
| 255484_at   | At4g02540 | 3.01 | Cysteine/Histidine-rich C1 domain family protein                                                                                                                                                                                                                                                                                                                                                                                                                                | 6.119E-12 |
| 253074_at   | At4g36140 | 3.01 | disease resistance protein (TIR-NBS-LRR class), putative                                                                                                                                                                                                                                                                                                                                                                                                                        | 4.445E-07 |
| 248395_at   | At5g52120 | 3.00 | AtPP2-A14, PP2-A14, phloem protein 2-A14                                                                                                                                                                                                                                                                                                                                                                                                                                        | 2.040E-11 |

<sup>a</sup> *Arabidopsis thaliana* gene identifier code assigned by the Arabidopsis Genome Initiatives (AGI; <https://www.arabidopsis.org/portals/nomenclature/>).

<sup>b</sup> Mean of two independent biological experiments (*aln-1* versus wild-type).

<sup>c</sup> Gene symbol and description as provided by The Arabidopsis Information Resource (TAIR; release 10; <https://www.arabidopsis.org/>).

<sup>d</sup> *P*-value determined by a two-way ANOVA.

**Table S4. Genes with significantly reduced expression in the *aln-1* mutant.**

Listed are those whose changes in transcript levels decreased by equal to or greater than 3-fold with the statistical significance level of 0.001 by a two-way analysis of variance (ANOVA). These genes were selected from the revised microarray data (Gene Expression Omnibus accession number GSE73841) that had been parametrically renormalized using the SuperNORM data service (Skylight Biotech Inc, Akita, Japan), according to the three-parameter lognormal distribution method (Konishi 2004).

| Affymetrix probe ID | AGI <sup>a</sup> | Fold change <sup>b</sup> | Gene symbol and description <sup>c</sup>                                                                                                                                                                                                                                                                                                                                                                                                                                                                                                                                    | P-value <sup>d</sup> |
|---------------------|------------------|--------------------------|-----------------------------------------------------------------------------------------------------------------------------------------------------------------------------------------------------------------------------------------------------------------------------------------------------------------------------------------------------------------------------------------------------------------------------------------------------------------------------------------------------------------------------------------------------------------------------|----------------------|
| 263174_at           | At1g54040        | -35.12                   | ESP, ESR, TASTY, epithiospecifier protein                                                                                                                                                                                                                                                                                                                                                                                                                                                                                                                                   | 6.444E-22            |
| 253707_at           | At4g29200        | -34.79                   | Beta-galactosidase related protein                                                                                                                                                                                                                                                                                                                                                                                                                                                                                                                                          | 1.139E-08            |
| 266385_at           | At2g14610        | -32.83                   | ATPR1, PR 1, PR1, pathogenesis-related gene 1                                                                                                                                                                                                                                                                                                                                                                                                                                                                                                                               | 4.620E-08            |
| 266070_at           | At2g18660        | -28.28                   | PNP-A, plant natriuretic peptide A                                                                                                                                                                                                                                                                                                                                                                                                                                                                                                                                          | 3.414E-07            |
| 255437_at           | At4g03060        | -24.18                   | AOP2, AOP2 (ALKENYL HYDROXALKYL PRODUCING 2); oxidoreductase, acting on paired donors, with incorporation or reduction of molecular oxygen, 2-oxoglutarate as one donor, and incorporation of one atom each of oxygen into both donors                                                                                                                                                                                                                                                                                                                                      | 4.062E-22            |
| 261449_at           | At1g21120        | -18.58                   | O-methyltransferase family protein                                                                                                                                                                                                                                                                                                                                                                                                                                                                                                                                          | 4.834E-06            |
| 252345_at           | At3g48640        | -15.34                   | unknown protein; FUNCTIONS IN: molecular_function unknown; INVOLVED IN: biological_process unknown; LOCATED IN: endomembrane system; EXPRESSED IN: 10 plant structures; EXPRESSED DURING: 10 growth stages; CONTAINS InterPro DOMAIN/s: Protein of unknown function DUF677 (InterPro:IPR007749); BEST Arabidopsis thaliana protein match is: Protein of unknown function (DUF677) (TAIR:AT5G66670.2); Has 42 Blast hits to 42 proteins in 3 species: Archae - 0; Bacteria - 0; Metazoa - 0; Fungi - 0; Plants - 42; Viruses - 0; Other Eukaryotes - 0 (source: NCBI BLink). | 1.603E-04            |
| 249082_at           | At5g44120        | -15.06                   | ATCRA1, CRA1, CRU1, RmlC-like cupins superfamily protein                                                                                                                                                                                                                                                                                                                                                                                                                                                                                                                    | 6.134E-07            |
| 259925_at           | At1g75040        | -13.69                   | PR-5, PR5, pathogenesis-related gene 5                                                                                                                                                                                                                                                                                                                                                                                                                                                                                                                                      | 3.250E-10            |
| 250445_at           | At5g10760        | -13.55                   | Eukaryotic aspartyl protease family protein                                                                                                                                                                                                                                                                                                                                                                                                                                                                                                                                 | 3.299E-11            |
| 253767_at           | At4g28520        | -13.53                   | CRC, CRU3, cruciferin 3                                                                                                                                                                                                                                                                                                                                                                                                                                                                                                                                                     | 5.723E-08            |
| 265837_at           | At2g14560        | -13.32                   | LURP1, Protein of unknown function (DUF567)                                                                                                                                                                                                                                                                                                                                                                                                                                                                                                                                 | 3.411E-10            |
| 250476_at           | At5g10140        | -12.50                   | AGL25, FLC, FLC, FLF, K-box region and MADS-box transcription factor family protein                                                                                                                                                                                                                                                                                                                                                                                                                                                                                         | 3.044E-19            |
| 262421_at           | At1g50290        | -10.78                   | unknown protein; Has 2 Blast hits to 2 proteins in 1 species: Archae - 0; Bacteria - 0; Metazoa - 0; Fungi - 0; Plants - 2; Viruses - 0; Other Eukaryotes - 0 (source: NCBI BLink).                                                                                                                                                                                                                                                                                                                                                                                         | 2.203E-22            |
| 246642_s_at         | At5g34920        | -10.76                   | transposable element gene                                                                                                                                                                                                                                                                                                                                                                                                                                                                                                                                                   | 2.470E-06            |
| 251344_at           | At3g60920        | -9.34                    | CONTAINS InterPro DOMAIN/s: Beige/BEACH (InterPro:IPR000409); BEST Arabidopsis thaliana protein match is: WD-40 repeat family protein / beige-related (TAIR:AT2G45540.1); Has 1795 Blast hits to 1563 proteins in 214 species: Archae - 2; Bacteria - 29; Metazoa - 830; Fungi - 160; Plants - 230; Viruses - 0; Other Eukaryotes - 544 (source: NCBI BLink).                                                                                                                                                                                                               | 2.455E-08            |
| 254574_at           | At4g19430        | -8.70                    | unknown protein; FUNCTIONS IN: molecular_function unknown; INVOLVED IN: biological_process unknown; LOCATED IN: chloroplast; EXPRESSED IN: 17 plant structures; EXPRESSED DURING: 13 growth stages; Has 30201 Blast hits to 17322 proteins in 780 species: Archae - 12; Bacteria - 1396; Metazoa - 17338; Fungi - 3422; Plants - 5037; Viruses - 0; Other Eukaryotes - 2996 (source: NCBI BLink).                                                                                                                                                                           | 1.484E-12            |
| 251625_at           | At3g57260        | -8.43                    | BG2, BGL2, PR-2, PR2, beta-1,3-glucanase 2                                                                                                                                                                                                                                                                                                                                                                                                                                                                                                                                  | 2.338E-11            |
| 248062_at           | At5g55450        | -8.29                    | Bifunctional inhibitor/lipid-transfer protein/seed storage 2S albumin superfamily protein                                                                                                                                                                                                                                                                                                                                                                                                                                                                                   | 5.891E-16            |
| 263133_at           | At1g78450        | -8.12                    | SOUL heme-binding family protein                                                                                                                                                                                                                                                                                                                                                                                                                                                                                                                                            | 2.275E-17            |
| 257365_x_at         | At2g26020        | -7.51                    | PDF1.2b, plant defensin 1.2b                                                                                                                                                                                                                                                                                                                                                                                                                                                                                                                                                | 1.537E-06            |
| 267546_at           | At2g32680        | -7.45                    | AtRLP23, RLP23, receptor like protein 23                                                                                                                                                                                                                                                                                                                                                                                                                                                                                                                                    | 5.887E-07            |
| 248683_at           | At5g48490        | -7.27                    | Bifunctional inhibitor/lipid-transfer protein/seed storage 2S albumin superfamily protein                                                                                                                                                                                                                                                                                                                                                                                                                                                                                   | 2.875E-17            |
| 252549_at           | At3g45860        | -7.09                    | CRK4, cysteine-rich RLK (RECEPTOR-like protein kinase) 4                                                                                                                                                                                                                                                                                                                                                                                                                                                                                                                    | 4.908E-11            |
| 265893_at           | At2g15040        | -7.01                    | AtRLP18, RLP18, pseudogene, disease resistance protein-related, low similarity to disease resistance protein Cf-2.1 (Lycopersicon pimpinellifolium) GI:1184075; contains Pfam profile PF00560: Leucine Rich Repeat; blastp match of 38% identity and 4.4e-96 P-value to GP 1184075 gb AAC15779.1  U42444 Cf-2.1 {Lycopersicon pimpinellifolium}                                                                                                                                                                                                                             | 1.419E-12            |
| 249777_at           | At5g24210        | -6.69                    | alpha/beta-Hydrolases superfamily protein                                                                                                                                                                                                                                                                                                                                                                                                                                                                                                                                   | 1.831E-10            |
| 247684_at           | At5g59670        | -6.59                    | Leucine-rich repeat protein kinase family protein                                                                                                                                                                                                                                                                                                                                                                                                                                                                                                                           | 4.733E-05            |
| 264513_at           | At1g09420        | -5.96                    | G6PD4, glucose-6-phosphate dehydrogenase 4                                                                                                                                                                                                                                                                                                                                                                                                                                                                                                                                  | 9.646E-26            |
| 256603_at           | At3g28270        | -5.94                    | Protein of unknown function (DUF677)                                                                                                                                                                                                                                                                                                                                                                                                                                                                                                                                        | 6.281E-22            |
| 258016_at           | At3g19350        | -5.92                    | MPC, maternally expressed pab C-terminal                                                                                                                                                                                                                                                                                                                                                                                                                                                                                                                                    | 7.141E-09            |
| 255653_at           | At4g00960        | -5.81                    | Protein kinase superfamily protein                                                                                                                                                                                                                                                                                                                                                                                                                                                                                                                                          | 2.461E-05            |
| 259385_at           | At1g13470        | -5.77                    | Protein of unknown function (DUF1262)                                                                                                                                                                                                                                                                                                                                                                                                                                                                                                                                       | 2.084E-05            |
| 255879_at           | At1g67000        | -5.70                    | Protein kinase superfamily protein                                                                                                                                                                                                                                                                                                                                                                                                                                                                                                                                          | 2.648E-06            |
| 249890_at           | At5g22570        | -5.67                    | ATWRKY38, WRKY38, WRKY DNA-binding protein 38                                                                                                                                                                                                                                                                                                                                                                                                                                                                                                                               | 1.900E-07            |
| 263947_at           | At2g35820        | -5.66                    | ureidoglycolate hydrolases                                                                                                                                                                                                                                                                                                                                                                                                                                                                                                                                                  | 2.486E-14            |
| 254265_s_at         | At4g23140        | -5.64                    | CRK6, cysteine-rich RLK (RECEPTOR-like protein kinase) 6                                                                                                                                                                                                                                                                                                                                                                                                                                                                                                                    | 1.302E-13            |
| 267253_at           | At2g22960        | -5.60                    | alpha/beta-Hydrolases superfamily protein                                                                                                                                                                                                                                                                                                                                                                                                                                                                                                                                   | 6.679E-06            |
| 262382_at           | At1g72920        | -5.52                    | Toll-Interleukin-Resistance (TIR) domain family protein                                                                                                                                                                                                                                                                                                                                                                                                                                                                                                                     | 9.049E-10            |
| 263584_at           | At2g17040        | -5.43                    | anac036, NAC036, NAC domain containing protein 36                                                                                                                                                                                                                                                                                                                                                                                                                                                                                                                           | 2.872E-06            |
| 258028_at           | At3g27473        | -5.42                    | Cysteine/Histidine-rich C1 domain family protein                                                                                                                                                                                                                                                                                                                                                                                                                                                                                                                            | 7.227E-11            |
| 248169_at           | At5g54610        | -5.22                    | ANK, ankyrin                                                                                                                                                                                                                                                                                                                                                                                                                                                                                                                                                                | 6.468E-10            |
| 256631_at           | At3g28320        | -4.85                    | Protein of unknown function (DUF677)                                                                                                                                                                                                                                                                                                                                                                                                                                                                                                                                        | 5.048E-07            |
| 260568_at           | At2g43570        | -4.76                    | CHI, chitinase, putative                                                                                                                                                                                                                                                                                                                                                                                                                                                                                                                                                    | 1.539E-07            |
| 249780_at           | At5g24240        | -4.67                    | Phosphatidylinositol 3- and 4-kinase ;Ubiquitin family protein                                                                                                                                                                                                                                                                                                                                                                                                                                                                                                              | 8.731E-11            |
| 249867_at           | At5g23020        | -4.65                    | IMS2, MAM-L, MAM3, 2-isopropylmalate synthase 2                                                                                                                                                                                                                                                                                                                                                                                                                                                                                                                             | 6.950E-18            |
| 262651_at           | At1g14100        | -4.60                    | FUT8, fucosyltransferase 8                                                                                                                                                                                                                                                                                                                                                                                                                                                                                                                                                  | 1.031E-12            |
| 265109_s_at         | At1g62630        | -4.56                    | Disease resistance protein (CC-NBS-LRR class) family                                                                                                                                                                                                                                                                                                                                                                                                                                                                                                                        | 1.868E-17            |
| 260904_at           | At1g02450        | -4.52                    | NIMIN-1, NIMIN1, NIM1-interacting 1                                                                                                                                                                                                                                                                                                                                                                                                                                                                                                                                         | 7.944E-07            |
| 257139_at           | At3g28890        | -4.49                    | AtRLP43, RLP43, receptor like protein 43                                                                                                                                                                                                                                                                                                                                                                                                                                                                                                                                    | 1.892E-06            |

|             |           |       |                                                                                                                                                                                                                                                                                                                                                                                                                                                                                                                                     |           |
|-------------|-----------|-------|-------------------------------------------------------------------------------------------------------------------------------------------------------------------------------------------------------------------------------------------------------------------------------------------------------------------------------------------------------------------------------------------------------------------------------------------------------------------------------------------------------------------------------------|-----------|
| 245038_at   | At2g26560 | -4.45 | PLA IIA, PLA2A, PLP2, PLP2, phospholipase A 2A                                                                                                                                                                                                                                                                                                                                                                                                                                                                                      | 1.557E-16 |
| 267084_at   | At2g41180 | -4.42 | VQ motif-containing protein                                                                                                                                                                                                                                                                                                                                                                                                                                                                                                         | 9.787E-13 |
| 267569_at   | At2g30790 | -4.38 | PSBP-2, photosystem II subunit P-2                                                                                                                                                                                                                                                                                                                                                                                                                                                                                                  | 1.660E-15 |
| 257382_at   | At2g40750 | -4.36 | ATWRKY54, WRKY54, WRKY DNA-binding protein 54                                                                                                                                                                                                                                                                                                                                                                                                                                                                                       | 2.989E-15 |
| 254253_at   | At4g23320 | -4.28 | CRK24, cysteine-rich RLK (RECEPTOR-like protein kinase) 24                                                                                                                                                                                                                                                                                                                                                                                                                                                                          | 2.008E-07 |
| 265063_at   | At1g61500 | -4.23 | S-locus lectin protein kinase family protein                                                                                                                                                                                                                                                                                                                                                                                                                                                                                        | 8.497E-14 |
| 249645_at   | At5g36910 | -4.22 | THI2.2, thionin 2.2                                                                                                                                                                                                                                                                                                                                                                                                                                                                                                                 | 1.596E-18 |
| 245349_at   | At4g16690 | -4.15 | ATMES16, MES16, methyl esterase 16                                                                                                                                                                                                                                                                                                                                                                                                                                                                                                  | 6.321E-11 |
| 265993_at   | At2g24160 | -4.12 | pseudogene, leucine rich repeat protein family, contains leucine rich-repeat domains Pfam:PF00560, INTERPRO:IPR001611; contains some similarity to Cf-4 (Lycopersicon hirsutum) gi 2808683 emb CAA05268; blastp match of 37% identity and 8.4e-98 P-value to GP 2808683 emb CAA05268.1  AJ002235 Cf-4 {Lycopersicon hirsutum}                                                                                                                                                                                                       | 3.359E-10 |
| 254805_at   | At4g12480 | -4.09 | pEARLI 1, Bifunctional inhibitor/lipid-transfer protein/seed storage 2S albumin superfamily protein                                                                                                                                                                                                                                                                                                                                                                                                                                 | 1.725E-10 |
| 246821_at   | At5g26920 | -4.04 | CBP60G, Cam-binding protein 60-like G                                                                                                                                                                                                                                                                                                                                                                                                                                                                                               | 3.237E-11 |
| 250063_at   | At5g17880 | -4.00 | CSA1, disease resistance protein (TIR-NBS-LRR class)                                                                                                                                                                                                                                                                                                                                                                                                                                                                                | 5.581E-18 |
| 266071_at   | At2g18680 | -3.99 | unknown protein; FUNCTIONS IN: molecular_function unknown; INVOLVED IN: biological_process unknown; LOCATED IN: endomembrane system; EXPRESSED IN: male gametophyte, pollen tube; EXPRESSED DURING: L mature pollen stage, M germinated pollen stage; BEST Arabidopsis thaliana protein match is: unknown protein (TAIR:AT2G18690.1); Has 30201 Blast hits to 17322 proteins in 780 species: Archae - 12; Bacteria - 1396; Metazoa - 17338; Fungi - 3422; Plants - 5037; Viruses - 0; Other Eukaryotes - 2996 (source: NCBI BLINK). | 3.373E-07 |
| 266286_at   | At2g29170 | -3.99 | NAD(P)-binding Rossmann-fold superfamily protein                                                                                                                                                                                                                                                                                                                                                                                                                                                                                    | 7.009E-12 |
| 246603_at   | At1g31690 | -3.98 | Copper amine oxidase family protein                                                                                                                                                                                                                                                                                                                                                                                                                                                                                                 | 7.832E-21 |
| 261221_at   | At1g19960 | -3.97 | BEST Arabidopsis thaliana protein match is: transmembrane receptors (TAIR:AT2G32140.1); Has 41 Blast hits to 41 proteins in 17 species: Archae - 0; Bacteria - 2; Metazoa - 23; Fungi - 0; Plants - 11; Viruses - 0; Other                                                                                                                                                                                                                                                                                                          | 2.356E-13 |
| 245052_at   | At2g26440 | -3.97 | Plant invertase/pectin methylesterase inhibitor superfamily                                                                                                                                                                                                                                                                                                                                                                                                                                                                         | 4.413E-19 |
| 250135_at   | At5g15360 | -3.94 | unknown protein; Has 4 Blast hits to 4 proteins in 2 species: Archae - 0; Bacteria - 0; Metazoa - 0; Fungi - 0; Plants - 4; Viruses - 0; Other Eukaryotes - 0 (source: NCBI BLINK).                                                                                                                                                                                                                                                                                                                                                 | 2.920E-10 |
| 257625_at   | At3g26230 | -3.91 | CYP71B24, cytochrome P450, family 71, subfamily B, polypeptide 24                                                                                                                                                                                                                                                                                                                                                                                                                                                                   | 5.710E-09 |
| 248327_at   | At5g52750 | -3.88 | Heavy metal transport/detoxification superfamily protein                                                                                                                                                                                                                                                                                                                                                                                                                                                                            | 3.025E-16 |
| 248848_at   | At5g46520 | -3.86 | Disease resistance protein (TIR-NBS-LRR class) family                                                                                                                                                                                                                                                                                                                                                                                                                                                                               | 1.433E-08 |
| 256336_at   | At1g72030 | -3.86 | Acyl-CoA N-acyltransferases (NAT) superfamily protein                                                                                                                                                                                                                                                                                                                                                                                                                                                                               | 1.160E-15 |
| 245690_at   | At5g04230 | -3.81 | ATPAL3, PAL3, phenyl alanine ammonia-lyase 3                                                                                                                                                                                                                                                                                                                                                                                                                                                                                        | 2.579E-06 |
| 253945_at   | At4g27050 | -3.80 | F-box/RNI-like superfamily protein                                                                                                                                                                                                                                                                                                                                                                                                                                                                                                  | 1.136E-19 |
| 257623_at   | At3g26210 | -3.78 | CYP71B23, cytochrome P450, family 71, subfamily B, polypeptide 23                                                                                                                                                                                                                                                                                                                                                                                                                                                                   | 8.243E-17 |
| 251705_at   | At3g56400 | -3.75 | ATWRKY70, WRKY70, WRKY DNA-binding protein 70                                                                                                                                                                                                                                                                                                                                                                                                                                                                                       | 7.516E-11 |
| 253414_at   | At4g33050 | -3.75 | EDA39, calmodulin-binding family protein                                                                                                                                                                                                                                                                                                                                                                                                                                                                                            | 1.033E-13 |
| 258537_at   | At3g04210 | -3.67 | Disease resistance protein (TIR-NBS class)                                                                                                                                                                                                                                                                                                                                                                                                                                                                                          | 1.045E-14 |
| 266395_at   | At2g43100 | -3.65 | ATLEUD1, IPMI2, isopropylmalate isomerase 2                                                                                                                                                                                                                                                                                                                                                                                                                                                                                         | 9.123E-11 |
| 259560_at   | At1g21270 | -3.63 | WAK2, wall-associated kinase 2                                                                                                                                                                                                                                                                                                                                                                                                                                                                                                      | 1.400E-10 |
| 252712_at   | At3g43800 | -3.52 | ATGSTU27, GSTU27, glutathione S-transferase tau 27                                                                                                                                                                                                                                                                                                                                                                                                                                                                                  | 3.544E-22 |
| 253911_at   | At4g27300 | -3.49 | S-locus lectin protein kinase family protein                                                                                                                                                                                                                                                                                                                                                                                                                                                                                        | 2.237E-25 |
| 246099_at   | At5g20230 | -3.46 | ATBCB, BCB, BCB, SAG14, blue-copper-binding protein                                                                                                                                                                                                                                                                                                                                                                                                                                                                                 | 5.289E-06 |
| 252060_at   | At3g52430 | -3.36 | ATPAD4, PAD4, alpha/beta-Hydrolases superfamily protein                                                                                                                                                                                                                                                                                                                                                                                                                                                                             | 7.033E-07 |
| 256376_s_at | At1g66690 | -3.34 | S-adenosyl-L-methionine-dependent methyltransferases superfamily protein                                                                                                                                                                                                                                                                                                                                                                                                                                                            | 1.219E-06 |
| 249843_at   | At5g23570 | -3.34 | ATSGS3, SGS3, XS domain-containing protein / XS zinc finger domain-containing protein-related                                                                                                                                                                                                                                                                                                                                                                                                                                       | 2.664E-14 |
| 258419_at   | At3g16670 | -3.33 | Pollen Ole e 1 allergen and extensin family protein                                                                                                                                                                                                                                                                                                                                                                                                                                                                                 | 4.390E-10 |
| 256382_at   | At1g66860 | -3.32 | Class I glutamine amidotransferase-like superfamily protein                                                                                                                                                                                                                                                                                                                                                                                                                                                                         | 3.460E-14 |
| 256596_at   | At3g28540 | -3.28 | P-loop containing nucleoside triphosphate hydrolases superfamily protein                                                                                                                                                                                                                                                                                                                                                                                                                                                            | 4.838E-08 |
| 247602_at   | At5g60900 | -3.28 | RLK1, receptor-like protein kinase 1                                                                                                                                                                                                                                                                                                                                                                                                                                                                                                | 5.753E-12 |
| 260745_at   | At1g78370 | -3.27 | ATGSTU20, GSTU20, glutathione S-transferase TAU 20                                                                                                                                                                                                                                                                                                                                                                                                                                                                                  | 1.747E-10 |
| 246293_at   | At3g56710 | -3.27 | SIB1, sigma factor binding protein 1                                                                                                                                                                                                                                                                                                                                                                                                                                                                                                | 3.155E-11 |
| 258277_at   | At3g26830 | -3.26 | CYP71B15, PAD3, Cytochrome P450 superfamily protein                                                                                                                                                                                                                                                                                                                                                                                                                                                                                 | 3.761E-05 |
| 248975_at   | At5g45040 | -3.26 | Cytochrome c                                                                                                                                                                                                                                                                                                                                                                                                                                                                                                                        | 2.017E-20 |
| 249481_at   | At5g38900 | -3.21 | Thioredoxin superfamily protein                                                                                                                                                                                                                                                                                                                                                                                                                                                                                                     | 2.793E-06 |
| 251524_at   | At3g58990 | -3.21 | IPMI1, isopropylmalate isomerase 1                                                                                                                                                                                                                                                                                                                                                                                                                                                                                                  | 6.946E-13 |
| 260396_at   | At1g69720 | -3.20 | HO3, heme oxygenase 3                                                                                                                                                                                                                                                                                                                                                                                                                                                                                                               | 2.576E-08 |
| 254231_at   | At4g23810 | -3.17 | ATWRKY53, WRKY53, WRKY family transcription factor                                                                                                                                                                                                                                                                                                                                                                                                                                                                                  | 1.288E-11 |
| 258147_at   | At3g18070 | -3.16 | BGLU43, beta glucosidase 43                                                                                                                                                                                                                                                                                                                                                                                                                                                                                                         | 1.110E-07 |
| 245592_at   | At4g14540 | -3.15 | NF-YB3, nuclear factor Y, subunit B3                                                                                                                                                                                                                                                                                                                                                                                                                                                                                                | 9.618E-11 |
| 263126_at   | At1g78460 | -3.13 | SOUL heme-binding family protein                                                                                                                                                                                                                                                                                                                                                                                                                                                                                                    | 6.918E-19 |
| 248970_at   | At5g45380 | -3.12 | ATDUR3, DUR3, solute:sodium symporters;urea transmembrane transporters                                                                                                                                                                                                                                                                                                                                                                                                                                                              | 1.316E-16 |
| 255184_at   | At4g07730 | -3.12 | transposable element gene                                                                                                                                                                                                                                                                                                                                                                                                                                                                                                           | 2.513E-06 |
| 252977_at   | At4g38560 | -3.08 | Arabidopsis phospholipase-like protein (PEARLI 4) family                                                                                                                                                                                                                                                                                                                                                                                                                                                                            | 1.235E-04 |
| 253046_at   | At4g37370 | -3.07 | CYP81D8, cytochrome P450, family 81, subfamily D, polypeptide 8                                                                                                                                                                                                                                                                                                                                                                                                                                                                     | 5.829E-09 |
| 264635_at   | At1g65500 | -3.06 | unknown protein; FUNCTIONS IN: molecular_function unknown; INVOLVED IN: biological_process unknown; LOCATED IN: endomembrane system; EXPRESSED IN: 14 plant structures; EXPRESSED DURING: 9 growth stages; BEST Arabidopsis thaliana protein match is: unknown protein (TAIR:AT1G65486.1); Has 23 Blast hits to 23 proteins in 2 species: Archae - 0; Bacteria - 0; Metazoa - 0; Fungi - 0; Plants - 23; Viruses - 0; Other Eukaryotes - 0 (source: NCBI BLINK).                                                                    | 8.677E-12 |
| 253411_at   | At4g32980 | -3.06 | ATH1, homeobox gene 1                                                                                                                                                                                                                                                                                                                                                                                                                                                                                                               | 2.344E-12 |
| 252411_at   | At3g47430 | -3.05 | PEX11B, peroxin 11B                                                                                                                                                                                                                                                                                                                                                                                                                                                                                                                 | 4.476E-13 |
| 258897_at   | At3g05730 | -3.05 | Encodes a defensin-like (DEFL) family protein.                                                                                                                                                                                                                                                                                                                                                                                                                                                                                      | 1.976E-07 |
| 262381_at   | At1g72900 | -3.04 | Toll-Interleukin-Resistance (TIR) domain-containing protein                                                                                                                                                                                                                                                                                                                                                                                                                                                                         | 8.690E-11 |
| 247812_at   | At5g58390 | -3.04 | Peroxidase superfamily protein                                                                                                                                                                                                                                                                                                                                                                                                                                                                                                      | 2.089E-10 |
| 255319_at   | At4g04220 | -3.01 | AtRLP46, RLP46, receptor like protein 46                                                                                                                                                                                                                                                                                                                                                                                                                                                                                            | 7.219E-12 |

|           |           |       |                                                                           |           |
|-----------|-----------|-------|---------------------------------------------------------------------------|-----------|
| 245454_at | At4g16920 | -3.00 | Disease resistance protein (TIR-NBS-LRR class) family                     | 1.522E-08 |
| 261782_at | At1g76110 | -3.00 | HMG (high mobility group) box protein with ARID/BRIGHT DNA-binding domain | 1.965E-12 |

---

<sup>a</sup> *Arabidopsis thaliana* gene identifier code assigned by the Arabidopsis Genome Initiatives (AGI; <https://www.arabidopsis.org/portals/nomenclature/>).

<sup>b</sup> Mean of two independent biological experiments (*aln-1* versus wild-type).

<sup>c</sup> Gene symbol and description as provided by The Arabidopsis Information Resource (TAIR; release 10; <https://www.arabidopsis.org/>).

<sup>d</sup> *P*-value determined by a two-way ANOVA.
